# Supplementary material for: Insertion chemistry of iron(ii) boryl complexes
Source: Royal Society of Chemistry journal article supplement (doi:10.1039/d2dt02879d), 2022-01-01
Supplement: d2dt02879d1.pdf [file d2dt02879d1.pdf]

# Electronic Supplementary Information for

## Insertion chemistry of iron(II) boryl complexes

Ana L. Narro, Hadi D. Arman and Zachary J. Tonzetich\*

Department of Chemistry, University of Texas at San Antonio (UTSA), San Antonio, TX 78249

[zachary.tonzetich@utsa.edu](mailto:zachary.tonzetich@utsa.edu)

---

| CONTENTS                                                                                                                                                                         | Pages |
|----------------------------------------------------------------------------------------------------------------------------------------------------------------------------------|-------|
| <b>Figure S1.</b> $^1\text{H}$ NMR spectrum of $[\text{Fe}(\text{Bpin})(^{\text{Cy}}\text{PNP})]$ ( <b>3a</b> ) generated from <b>1</b> · <b>py</b> in benzene- $d_6$ .          | S2    |
| <b>Figure S2.</b> $^1\text{H}$ NMR spectrum of $[\text{Fe}(\text{Bpin})(^{\text{Cy}}\text{PNP})]$ ( <b>3a</b> ) generated from <b>2</b> in toluene- $d_8$                        | S3    |
| <b>Figure S3.</b> $^1\text{H}$ NMR spectrum of $[\text{Fe}(\text{Bcat})(^{\text{Cy}}\text{PNP})]$ ( <b>3b</b> ) in benzene- $d_6$ .                                              | S4    |
| <b>Figure S4.</b> $^1\text{H}$ NMR spectrum of putative $[\text{Fe}(\text{Bcat})(\text{CO})_2(^{\text{Cy}}\text{PNP})]$ ( <b>3b</b> · <b>CO</b> ) in benzene- $d_6$ .            | S5    |
| <b>Figure S5.</b> $^1\text{H}$ NMR spectrum of the reaction of <b>3b</b> with 2,2'-bipyridine in benzene- $d_6$ .                                                                | S6    |
| <b>Figure S6.</b> $^1\text{H}$ NMR spectrum of $[\text{Fe}(\text{CO})_2(\text{OPh})(^{\text{Cy}}\text{PNP})]$ ( <b>1</b> · <b>CO</b> ) in benzene- $d_6$ .                       | S7    |
| <b>Figure S7.</b> $^1\text{H}$ NMR spectrum of $[\text{Fe}(\text{bipy})(\text{OPh})(^{\text{Cy}}\text{PNP})]$ ( <b>1</b> · <b>bipy</b> ) in benzene- $d_6$ .                     | S8    |
| <b>Figure S8.</b> $^1\text{H}$ NMR spectrum of $[\text{Fe}(\text{C}\{\text{Me}\}\text{C}\{\text{Me}\}\text{Bpin})(^{\text{Cy}}\text{PNP})]$ ( <b>4a</b> ) in benzene- $d_6$ .    | S9    |
| <b>Figure S9.</b> $^1\text{H}$ NMR spectrum of $[\text{Fe}(\text{C}\{\text{Me}\}\text{C}\{\text{Me}\}\text{Bcat})(^{\text{Cy}}\text{PNP})]$ ( <b>4b</b> ) in benzene- $d_6$ .    | S10   |
| <b>Figure S10.</b> $^1\text{H}$ NMR spectrum of $[\text{Fe}(\text{C}\{\text{Ph}\}\text{C}\{\text{H}\}\text{Bpin})(^{\text{Cy}}\text{PNP})]$ ( <b>5a</b> ) in benzene- $d_6$ .    | S11   |
| <b>Figure S11.</b> $^1\text{H}$ NMR spectrum of $[\text{Fe}(\text{C}\{\text{Ph}\}\text{C}\{\text{H}\}\text{Bcat})(^{\text{Cy}}\text{PNP})]$ ( <b>5b</b> ) in toluene- $d_8$ .    | S12   |
| <b>Figure S12.</b> $^1\text{H}$ NMR spectrum of $[\text{Fe}(\text{C}\{\text{Ph}\}\text{C}\{\text{Me}\}\text{Bpin})(^{\text{Cy}}\text{PNP})]$ ( <b>6a</b> ) in toluene- $d_8$ .   | S13   |
| <b>Figure S13.</b> $^1\text{H}$ NMR spectrum of $[\text{Fe}(\text{C}\{\text{Ph}\}\text{C}\{\text{CCPh}\}\text{Bpin})(^{\text{Cy}}\text{PNP})]$ ( <b>7a</b> ) in benzene- $d_6$ . | S14   |
| <b>Figure S14.</b> $^1\text{H}$ NMR spectrum of $[\text{Fe}(\text{C}\{\text{Ad}\}\text{NBpin})(^{\text{Cy}}\text{PNP})]$ ( <b>8</b> ) in benzene- $d_6$ .                        | S15   |
| <b>Figure S15.</b> $^{19}\text{F}$ NMR spectrum of the reaction of <b>3a</b> and 4-fluorostyrene in benzene- $d_6$ .                                                             | S16   |
| <b>Figure S16.</b> Thermal ellipsoid drawing (50%) of the solid-state structure of $\text{PhO}(\text{py})\text{Bcat}$ .                                                          | S17   |
| <b>Figure S17.</b> Thermal ellipsoid drawing (50%) of the solid-state structure of <b>1</b> · <b>CO</b> .                                                                        | S18   |
| <b>Figure S18.</b> Thermal ellipsoid drawing (50%) of the solid-state structure of <b>1</b> · <b>bipy</b> .                                                                      | S19   |
| <b>Figure S19.</b> Thermal ellipsoid drawing (50%) of the solid-state structure of <b>5b</b> .                                                                                   | S20   |
| <b>Figure S20.</b> Thermal ellipsoid drawing (50%) of the solid-state structure of <b>6a</b> .                                                                                   | S21   |
| <b>Figure S21.</b> Thermal ellipsoid drawing (50%) of the solid-state structure of <b>7a</b> .                                                                                   | S22   |

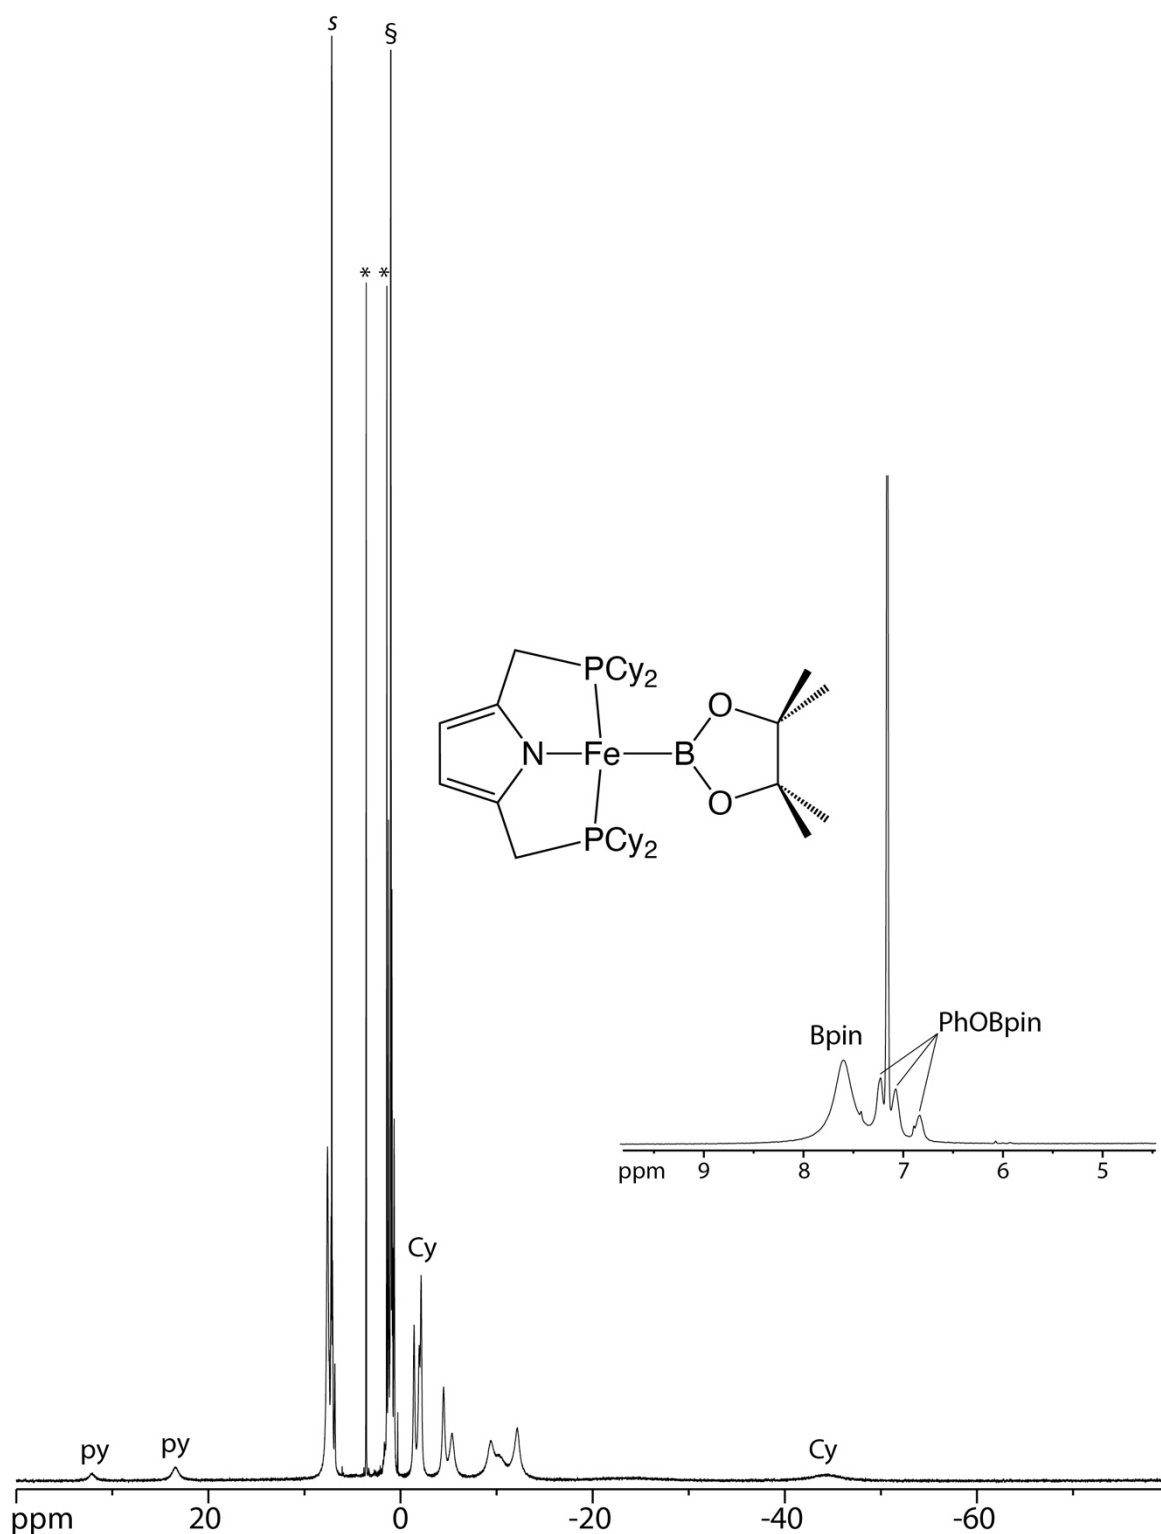

**Figure S1.** 300 MHz <sup>1</sup>H NMR spectrum of [Fe(Bpin)(<sup>Cy</sup>PNP)] (**3a**) in benzene-*d*<sub>6</sub>(*s*) generated from the reaction of **1·py** and B<sub>2</sub>pin<sub>2</sub>. Inset displays an expansion of the region from 4 to 10 ppm showing peaks for the expected byproduct, PhOBpin. Asterisks denote resonances for thf used in the preparation of **1·py**. The resonance for excess B<sub>2</sub>pin<sub>2</sub> and PhOBpin is marked with §.

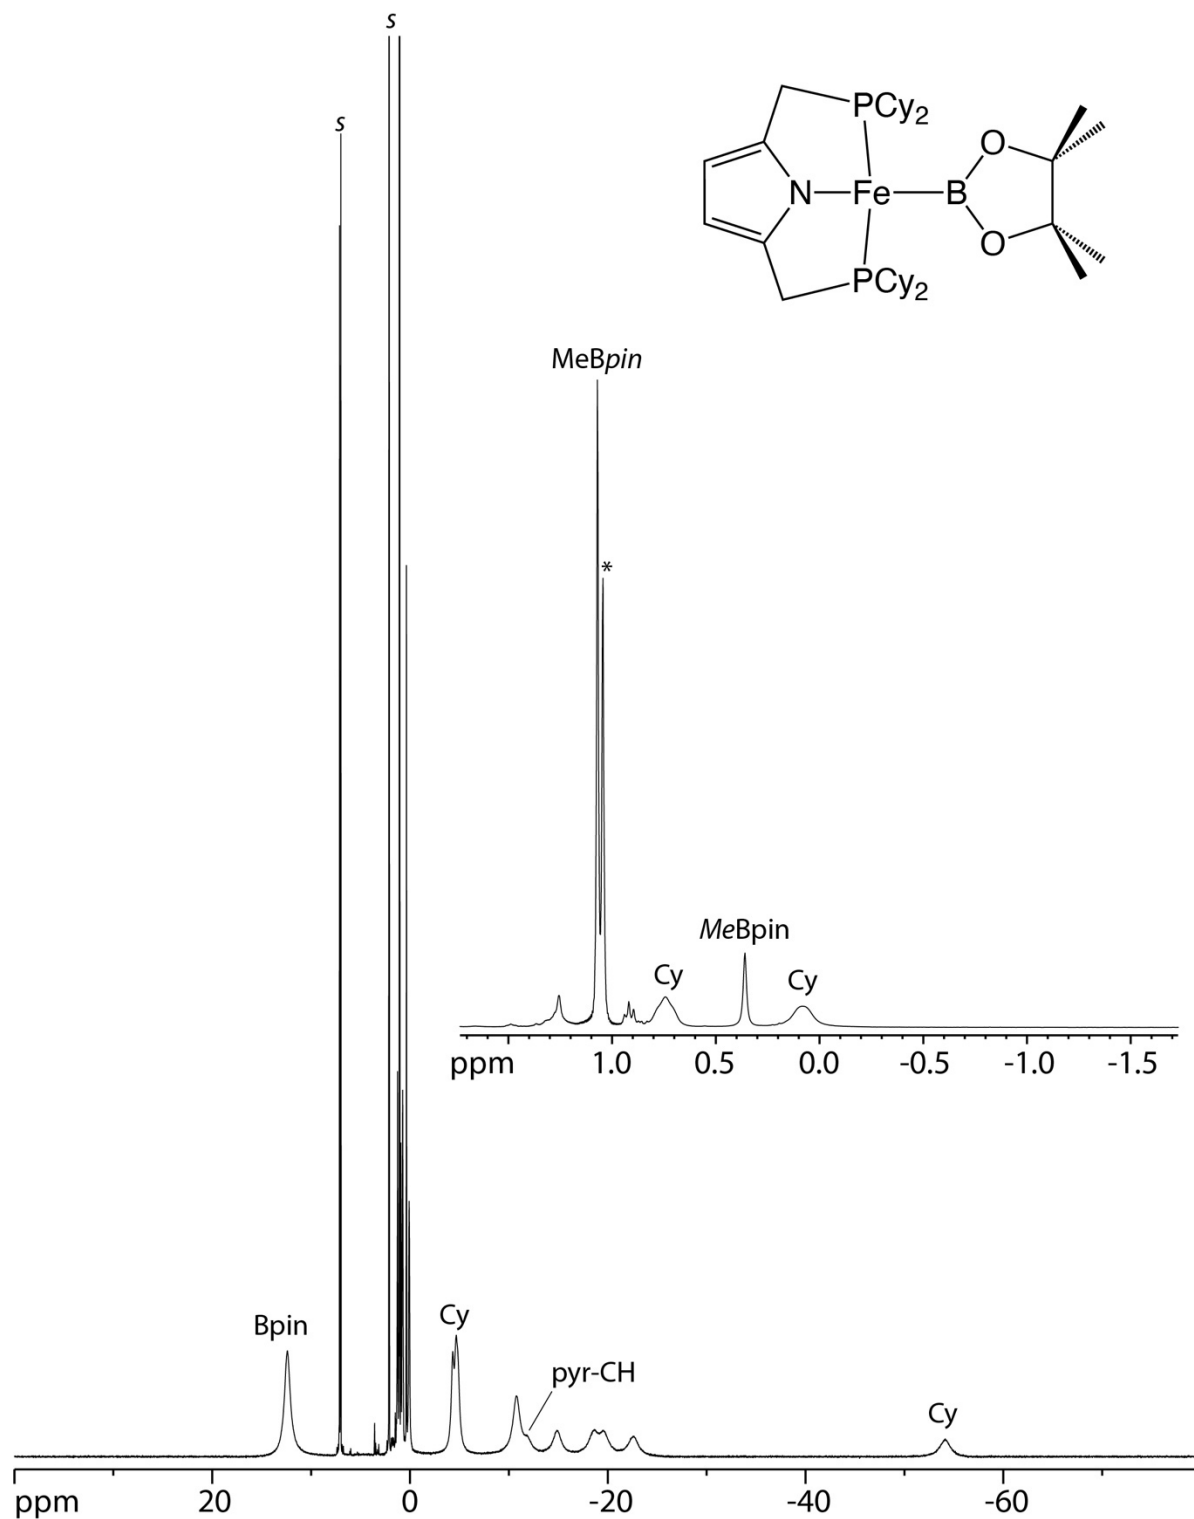

**Figure S2.** 300 MHz  $^1\text{H}$  NMR spectrum of  $[\text{Fe}(\text{Bpin})(\text{CyPNP})]$  (**3a**) in  $\text{toluene-}d_8(s)$  generated from the reaction of **2** and  $\text{B}_2\text{pin}_2$ . Inset displays an expansion of the region from -2 to 2 ppm showing peaks for the expected byproduct, MeBpin. Asterisk denotes the resonance for excess  $\text{B}_2\text{pin}_2$ .

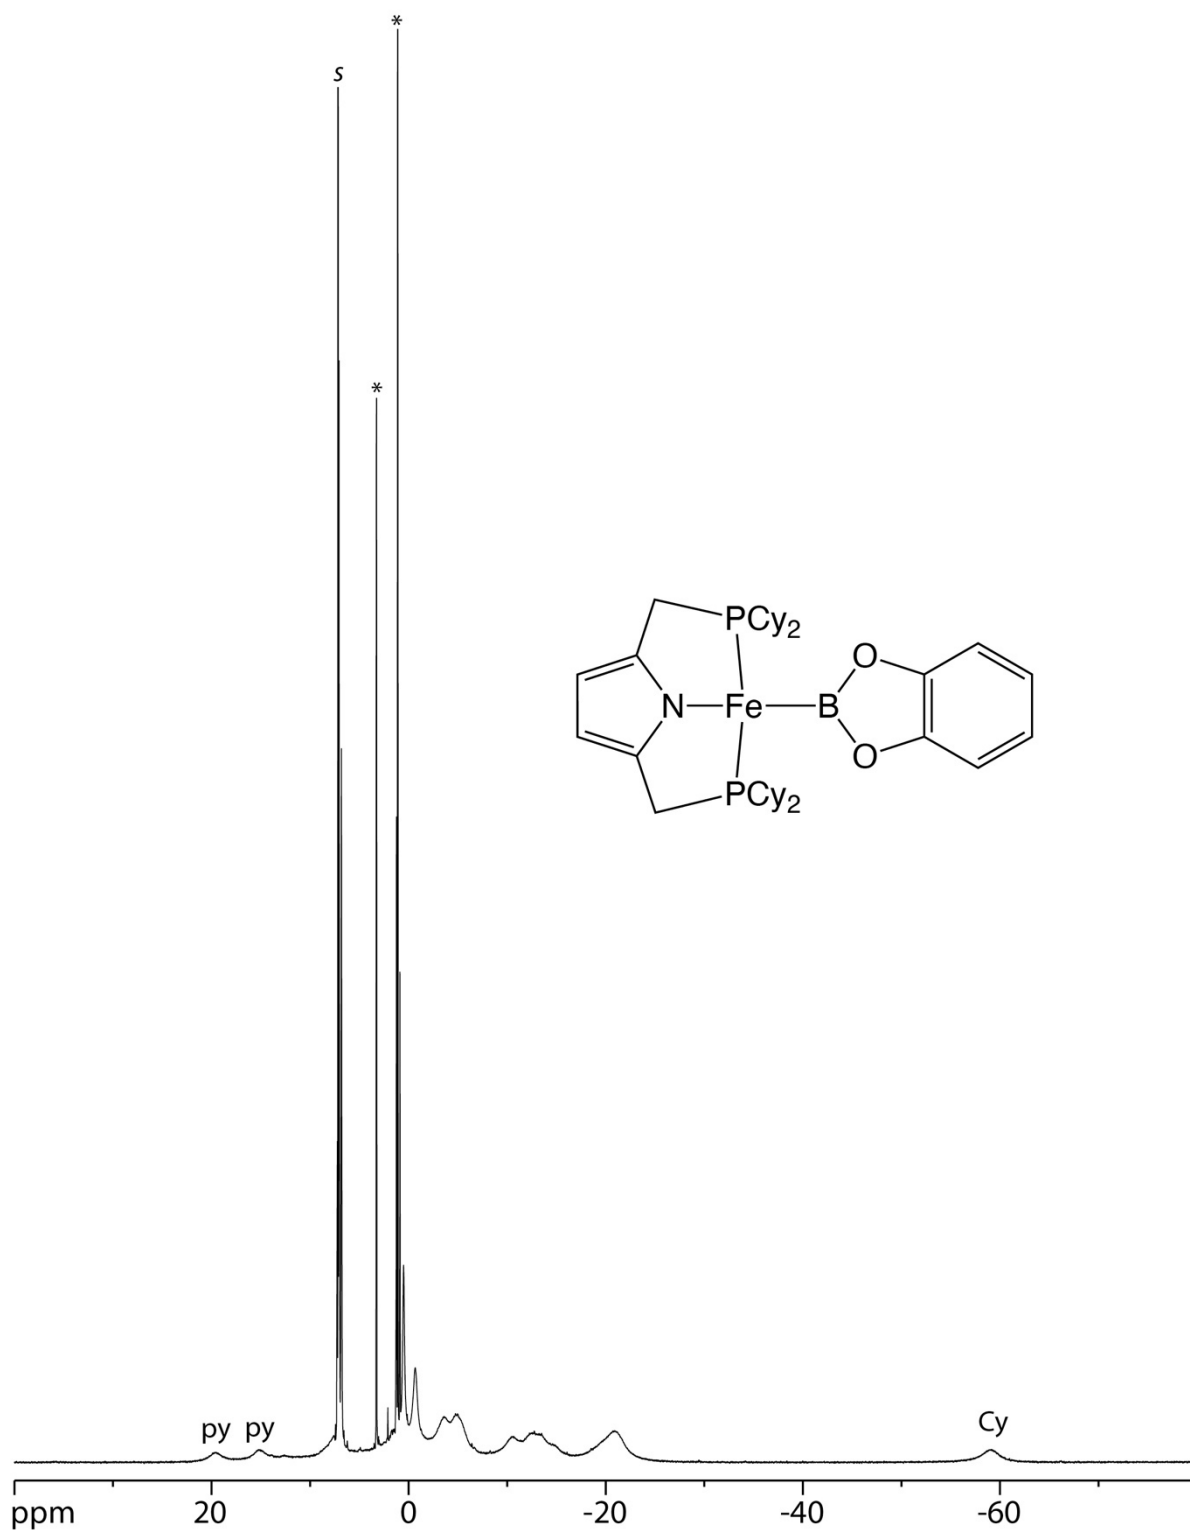

**Figure S3.** 300 MHz  $^1\text{H}$  NMR spectrum of  $[\text{Fe}(\text{Bcat})(\text{CyPNP})]$  (**3b**) in benzene- $d_6$ (s) generated from the reaction of **1·py** and  $\text{B}_2\text{cat}_2$ . Asterisks denotes resonances for  $\text{Et}_2\text{O}$  used in purification of **1·py**.

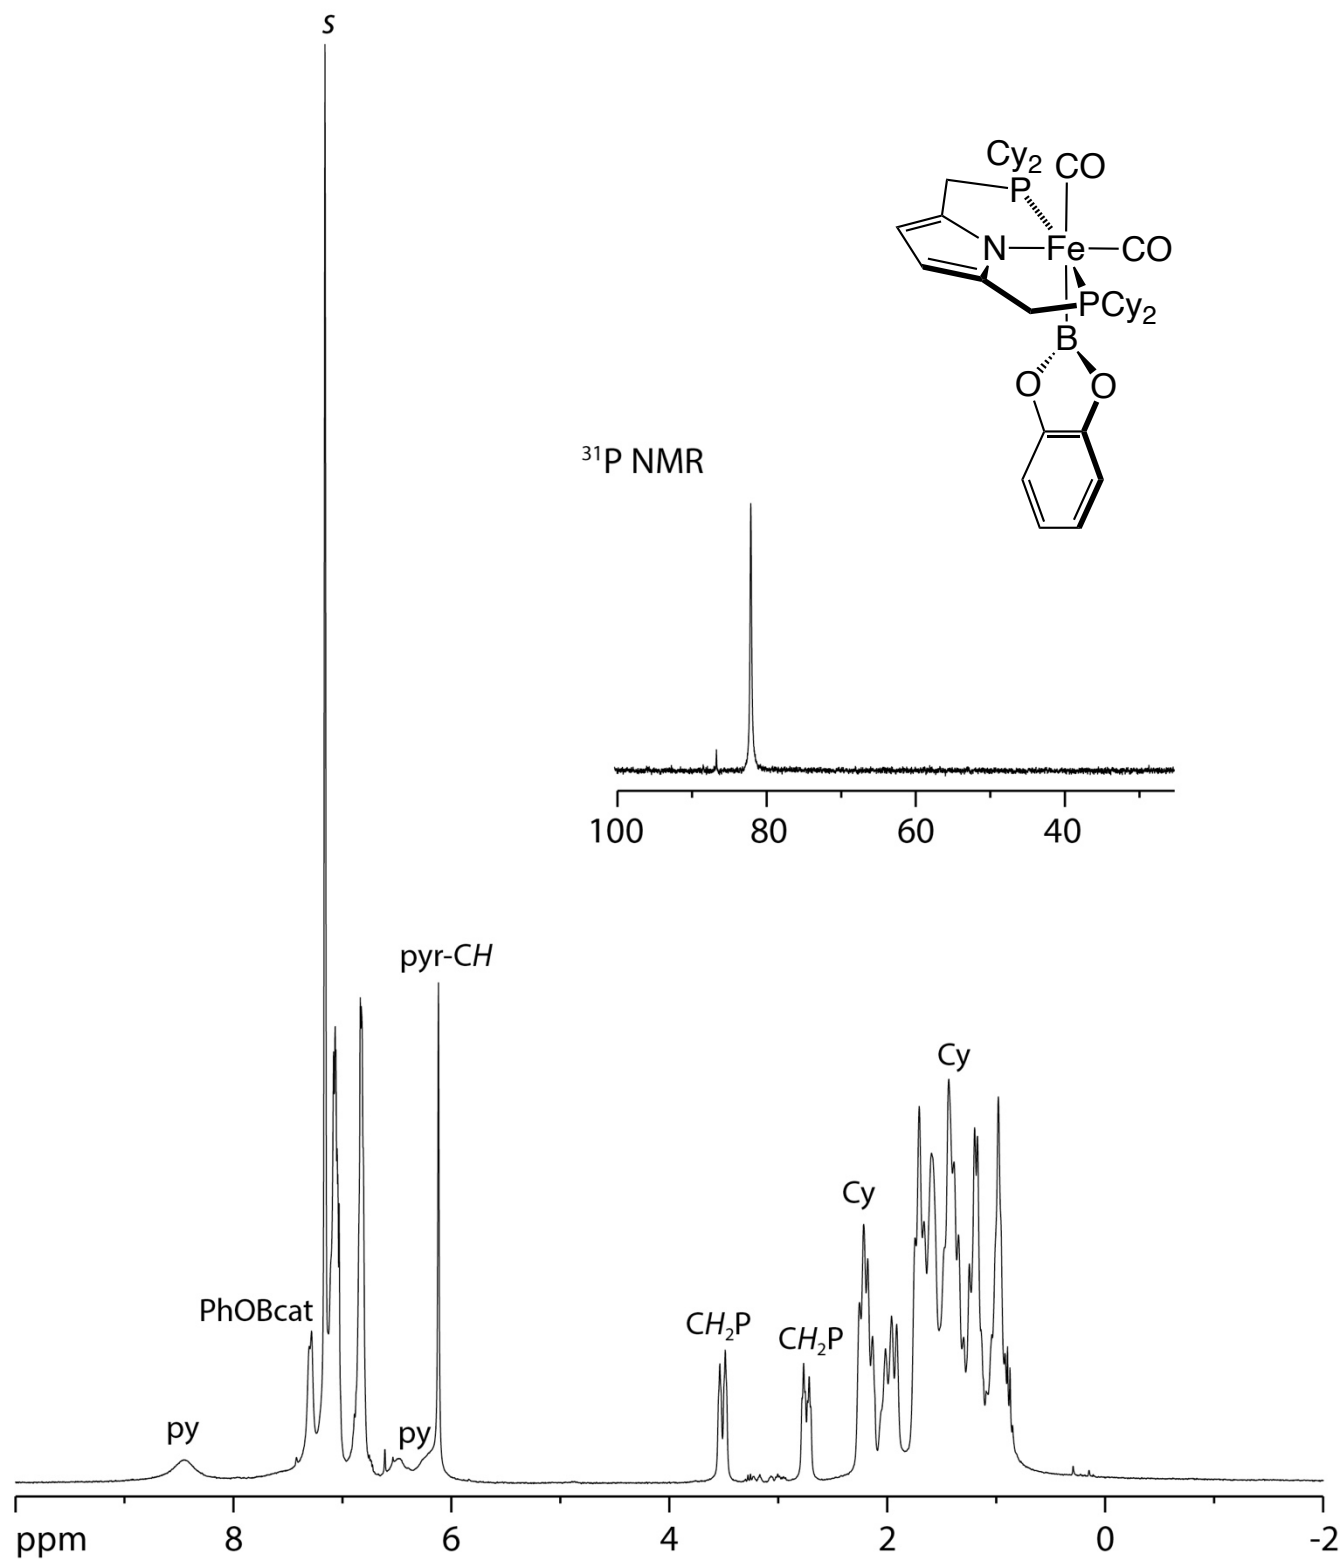

**Figure S4.** 300 MHz  $^1\text{H}$  NMR spectrum of putative  $[\text{Fe}(\text{Bcat})(\text{CO})_2(\text{CyPNP})]$  (**3b**·CO) in benzene- $d_6$ (s) generated from the reaction of **1**·py and  $\text{B}_2\text{cat}_2$  followed by introduction of  $\text{CO}(\text{g})$ .

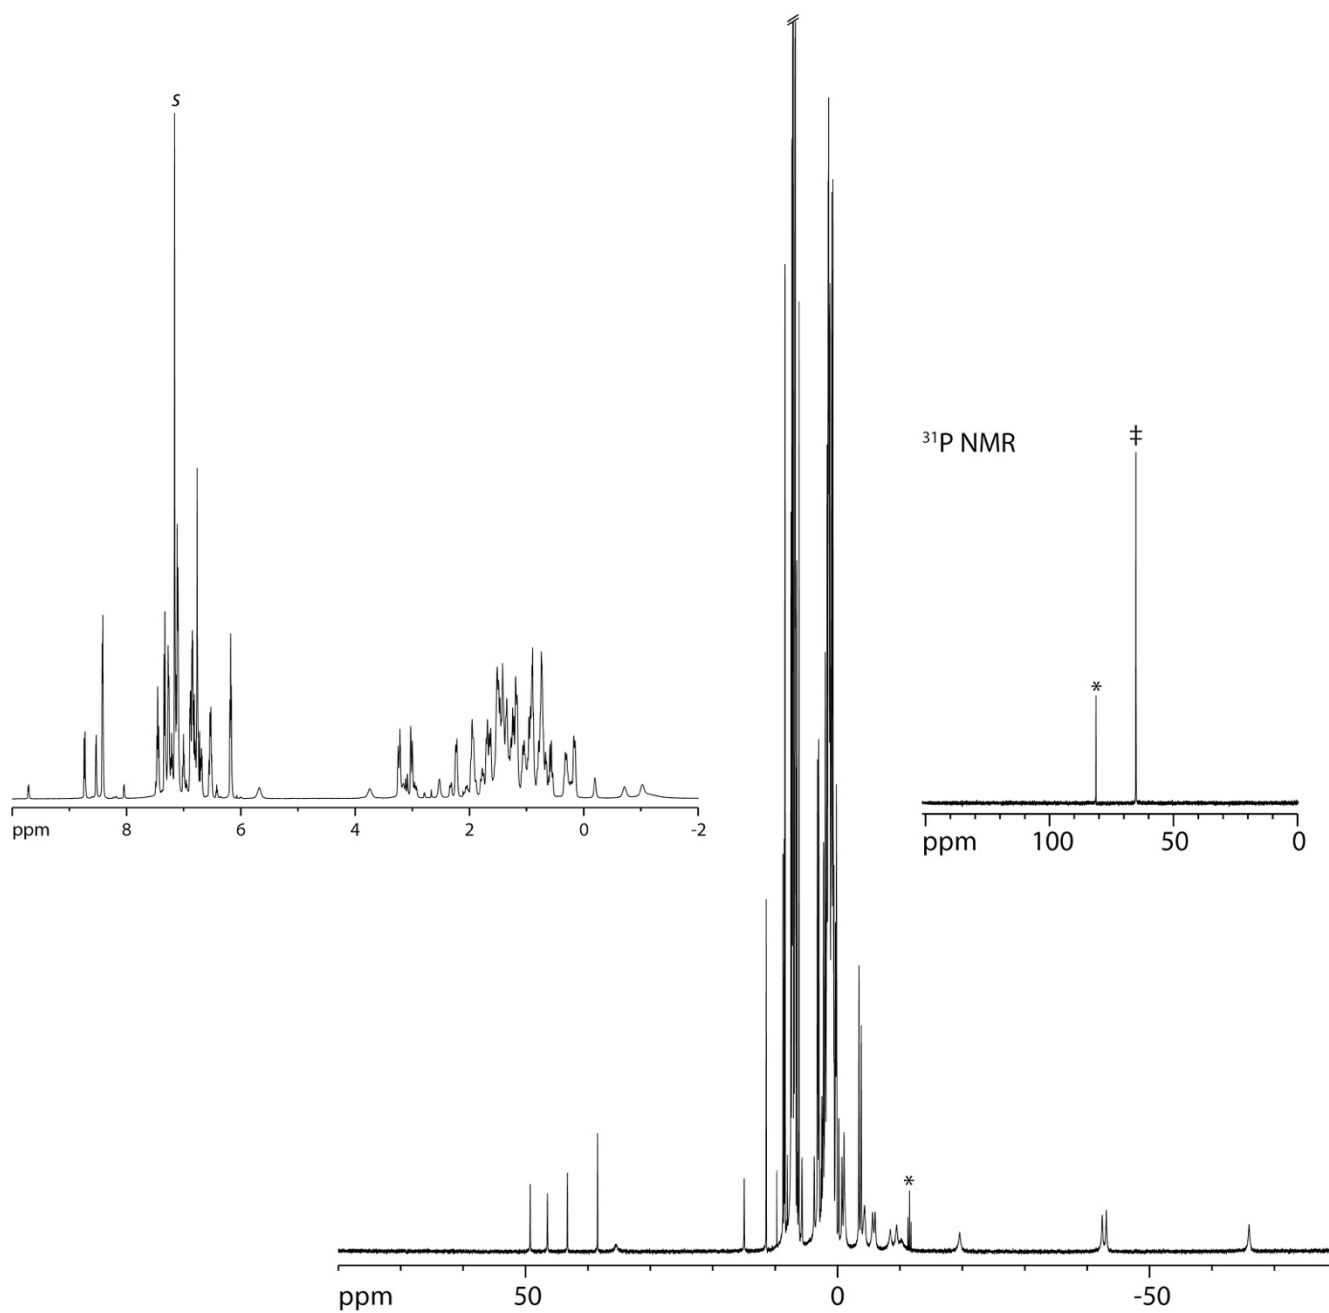

**Figure S5.** 300 MHz  $^1\text{H}$  NMR spectrum of the reaction of in situ-generated  $[\text{Fe}(\text{Bcat})(\text{CyPNP})]$  (**3b**) with 2,2'-bipyridine in benzene- $d_6(s)$ . Left inset displays expansion of the diamagnetic region. Asterisks denote resonances for  $[\text{FeH}(\text{bipy})(\text{CyPNP})]$ .  $^{31}\text{P}$  NMR resonance for putative **3b**·**bipy** is marked with ‡.

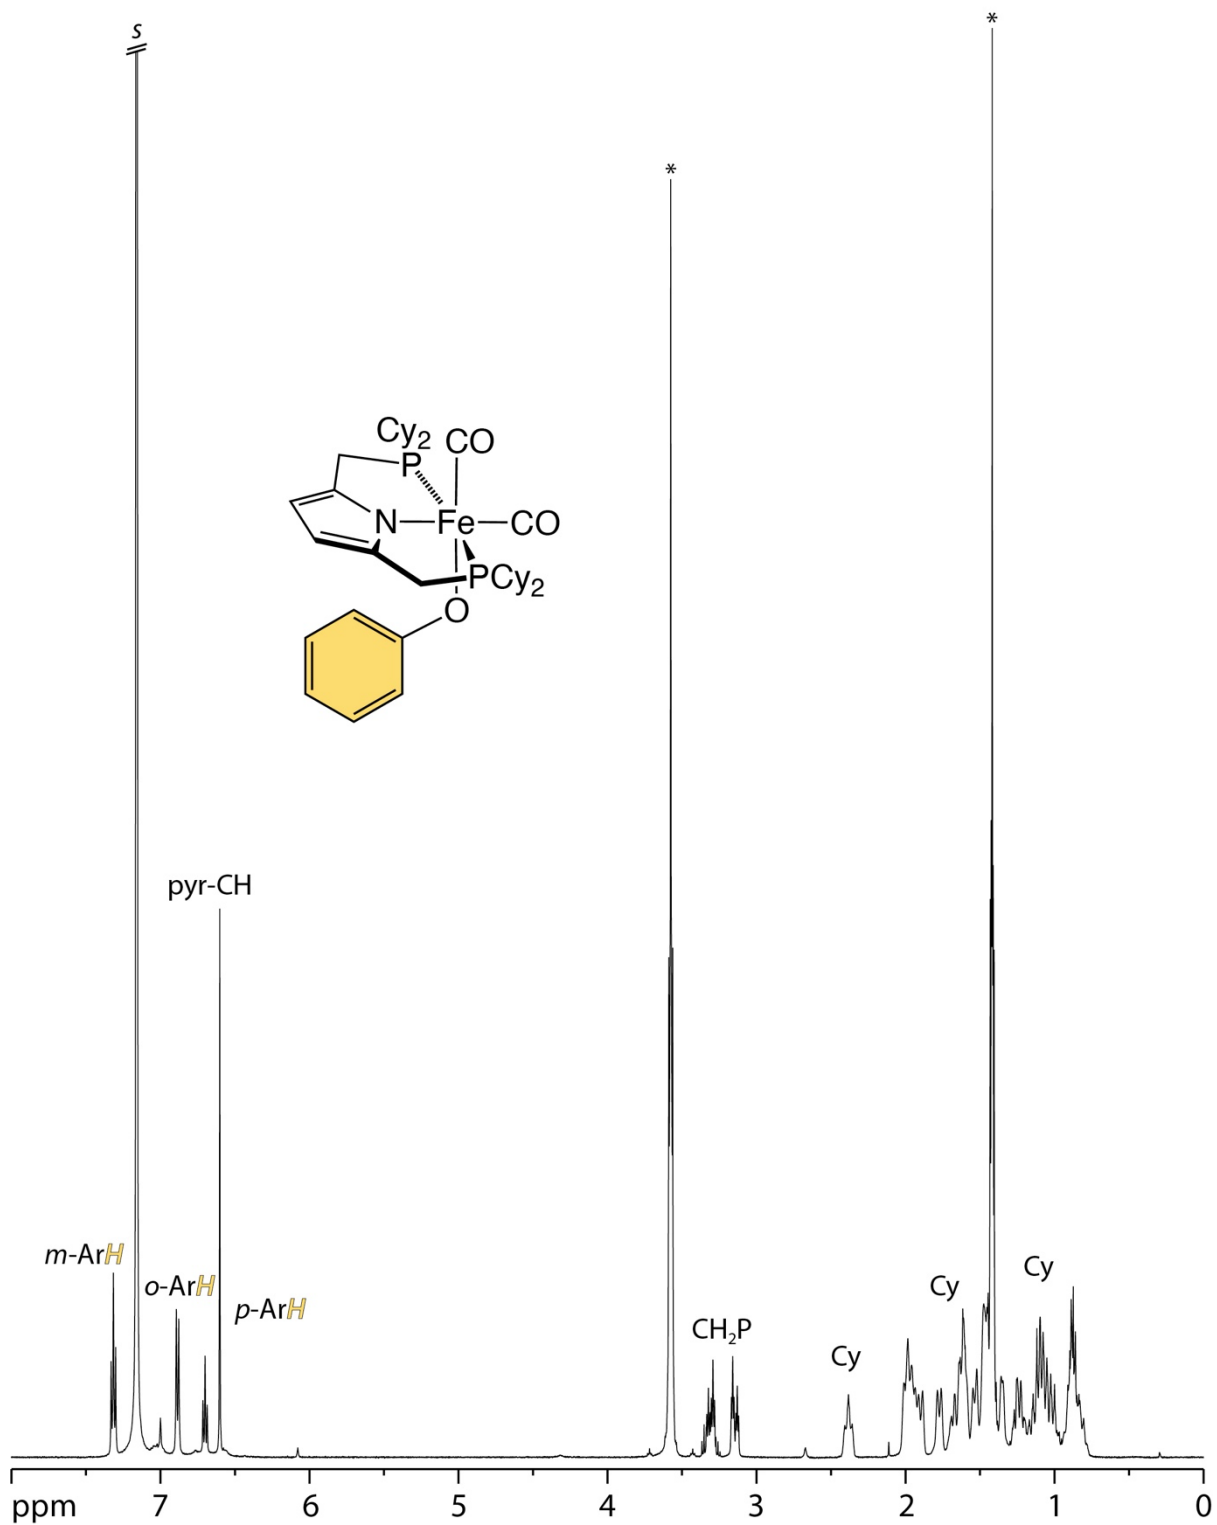

**Figure S6.** 500 MHz  $^1\text{H}$  NMR spectrum of  $[\text{Fe}(\text{CO})_2(\text{OPh})(\text{CyPNP})]$  (**1-CO**) in benzene- $d_6$ (s). Asterisks denotes resonances for thf used in preparation of **1-py**.

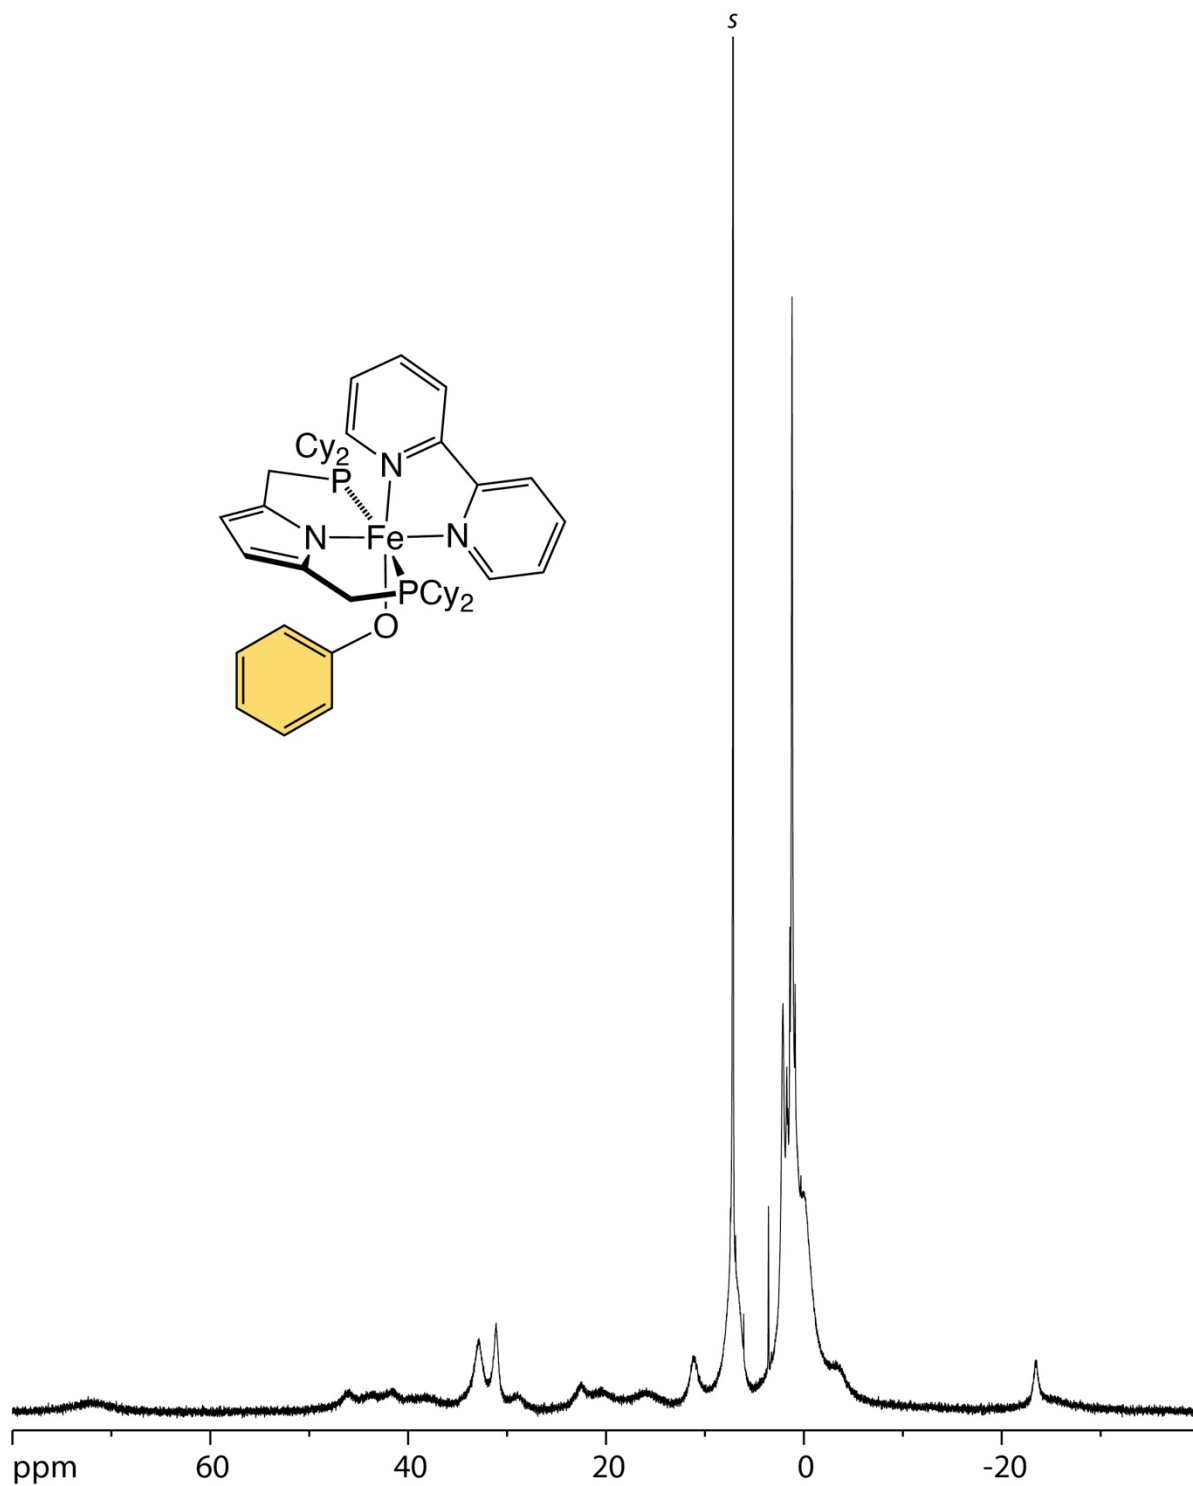

**Figure S7.** 300 MHz <sup>1</sup>H NMR spectrum of [Fe(bipy)(OPh)(<sup>Cy</sup>PNP)] (**1·bipy**) in benzene-*d*<sub>6</sub>(*s*).



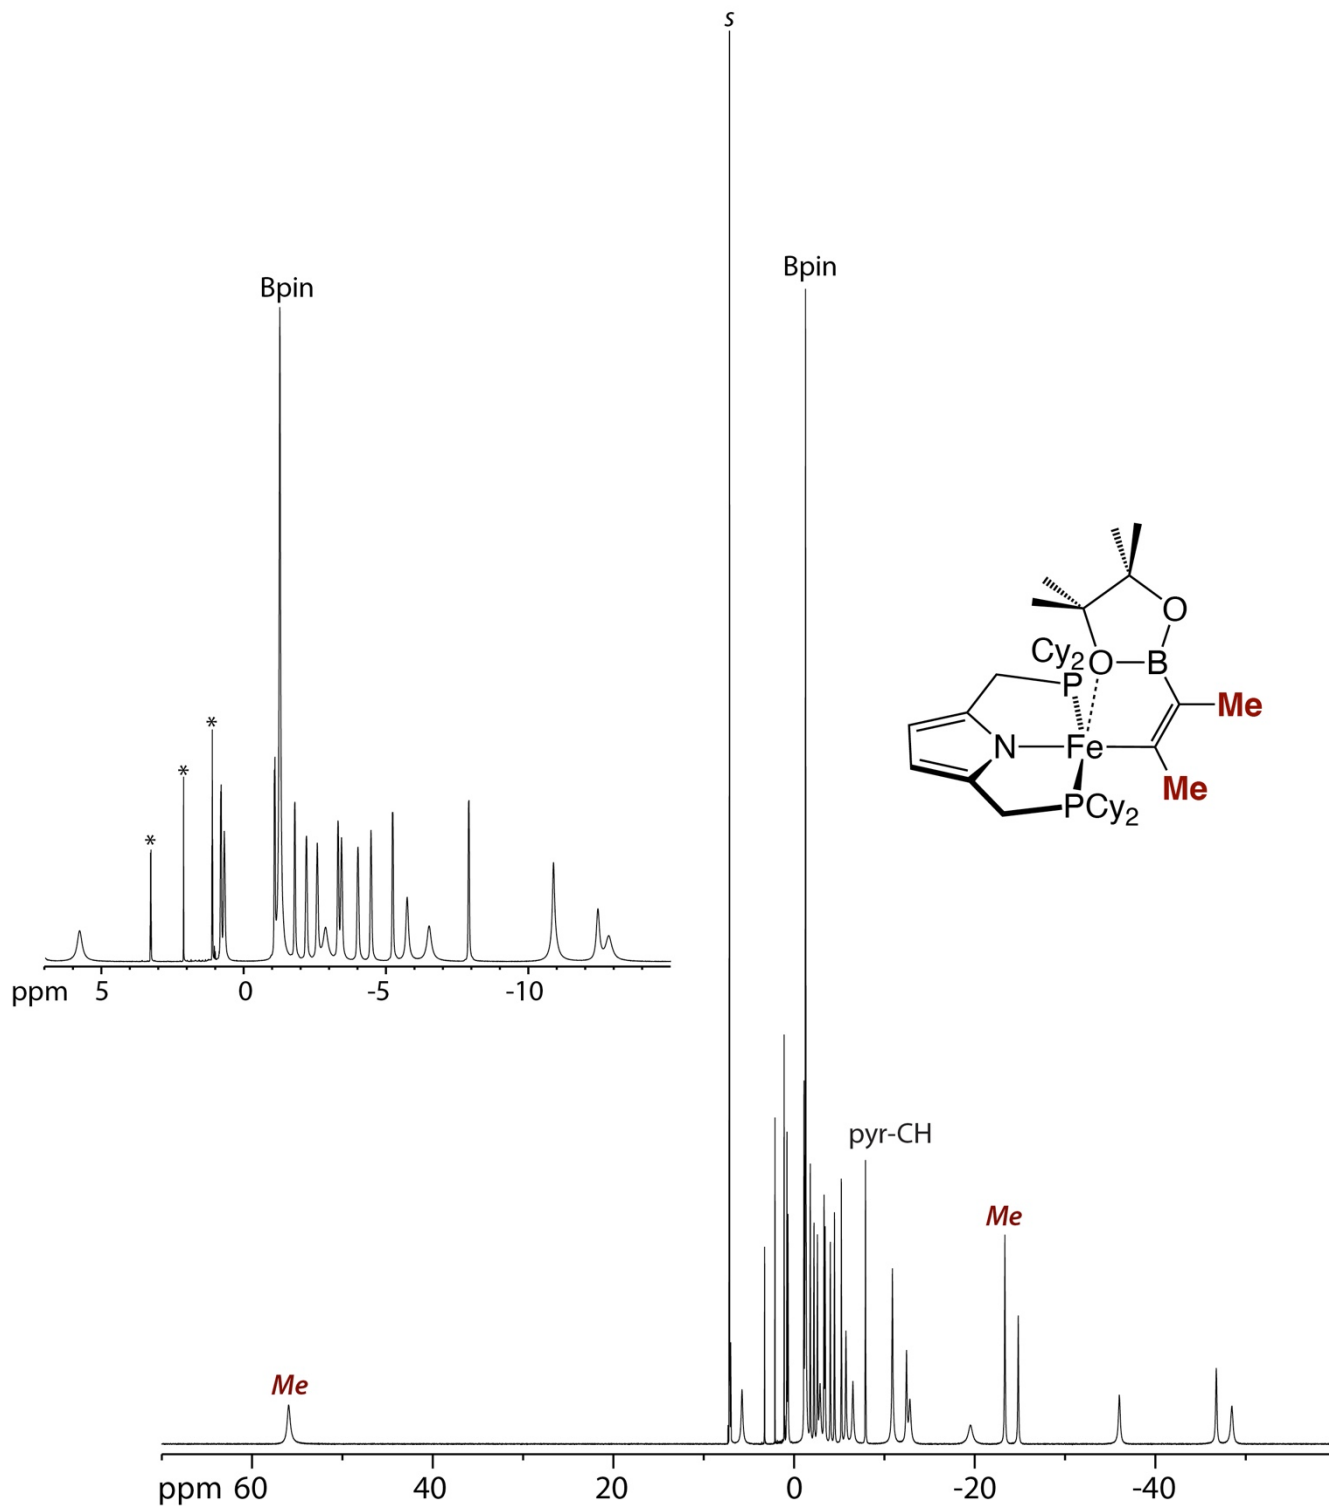

**Figure S8.** 300 MHz  $^1\text{H}$  NMR spectrum of  $[\text{Fe}(\text{C}\{\text{Me}\}\text{C}\{\text{Me}\}\text{Bpin})(\text{CyPNP})]$  (**4a**) in benzene- $d_6$ (s). Inset displays an expansion of the region from -15 to 7 ppm. Asterisks denote resonances for toluene and ether used in purification.

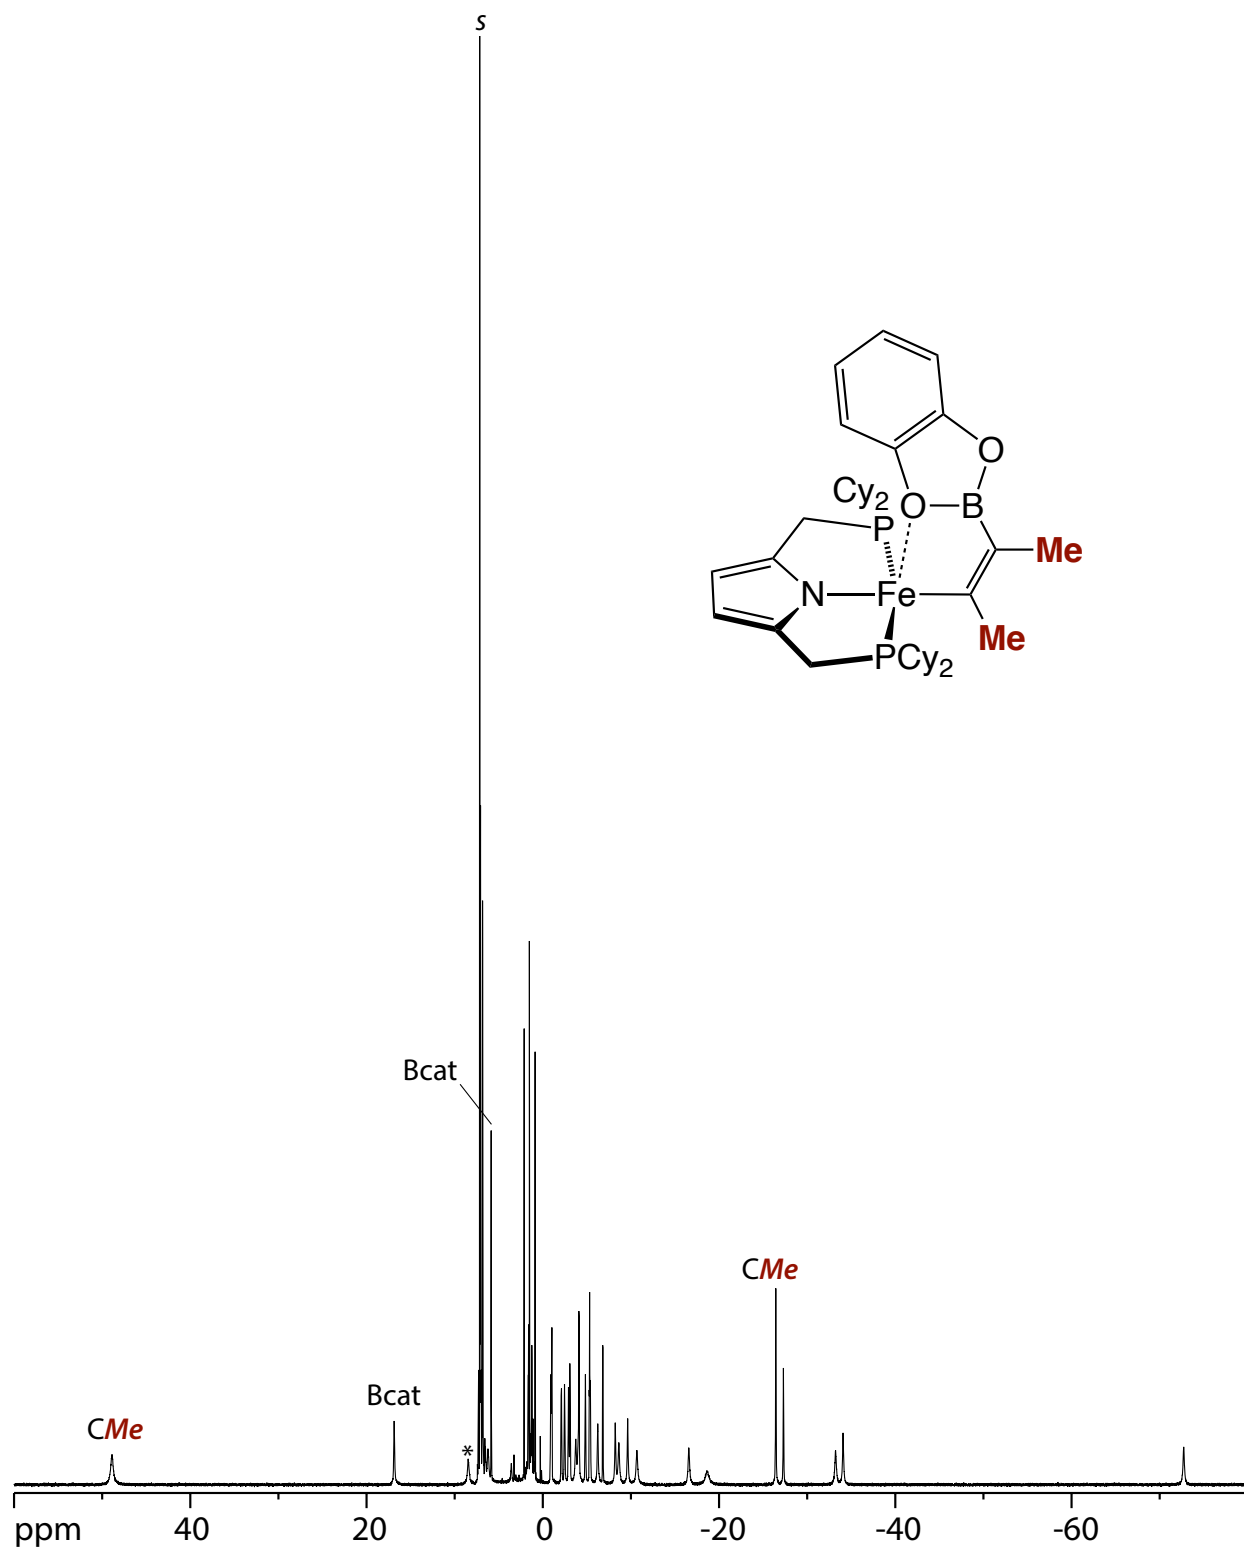

**Figure S9.** 300 MHz  $^1\text{H}$  NMR spectrum of  $[\text{Fe}(\text{C}\{\text{Me}\}\text{C}\{\text{Me}\}\text{Bcat})(\text{CyPNP})]$  (**4b**) in benzene- $d_6$ (s). Asterisks denote a resonance from the pyridine byproduct, PhOBcat.

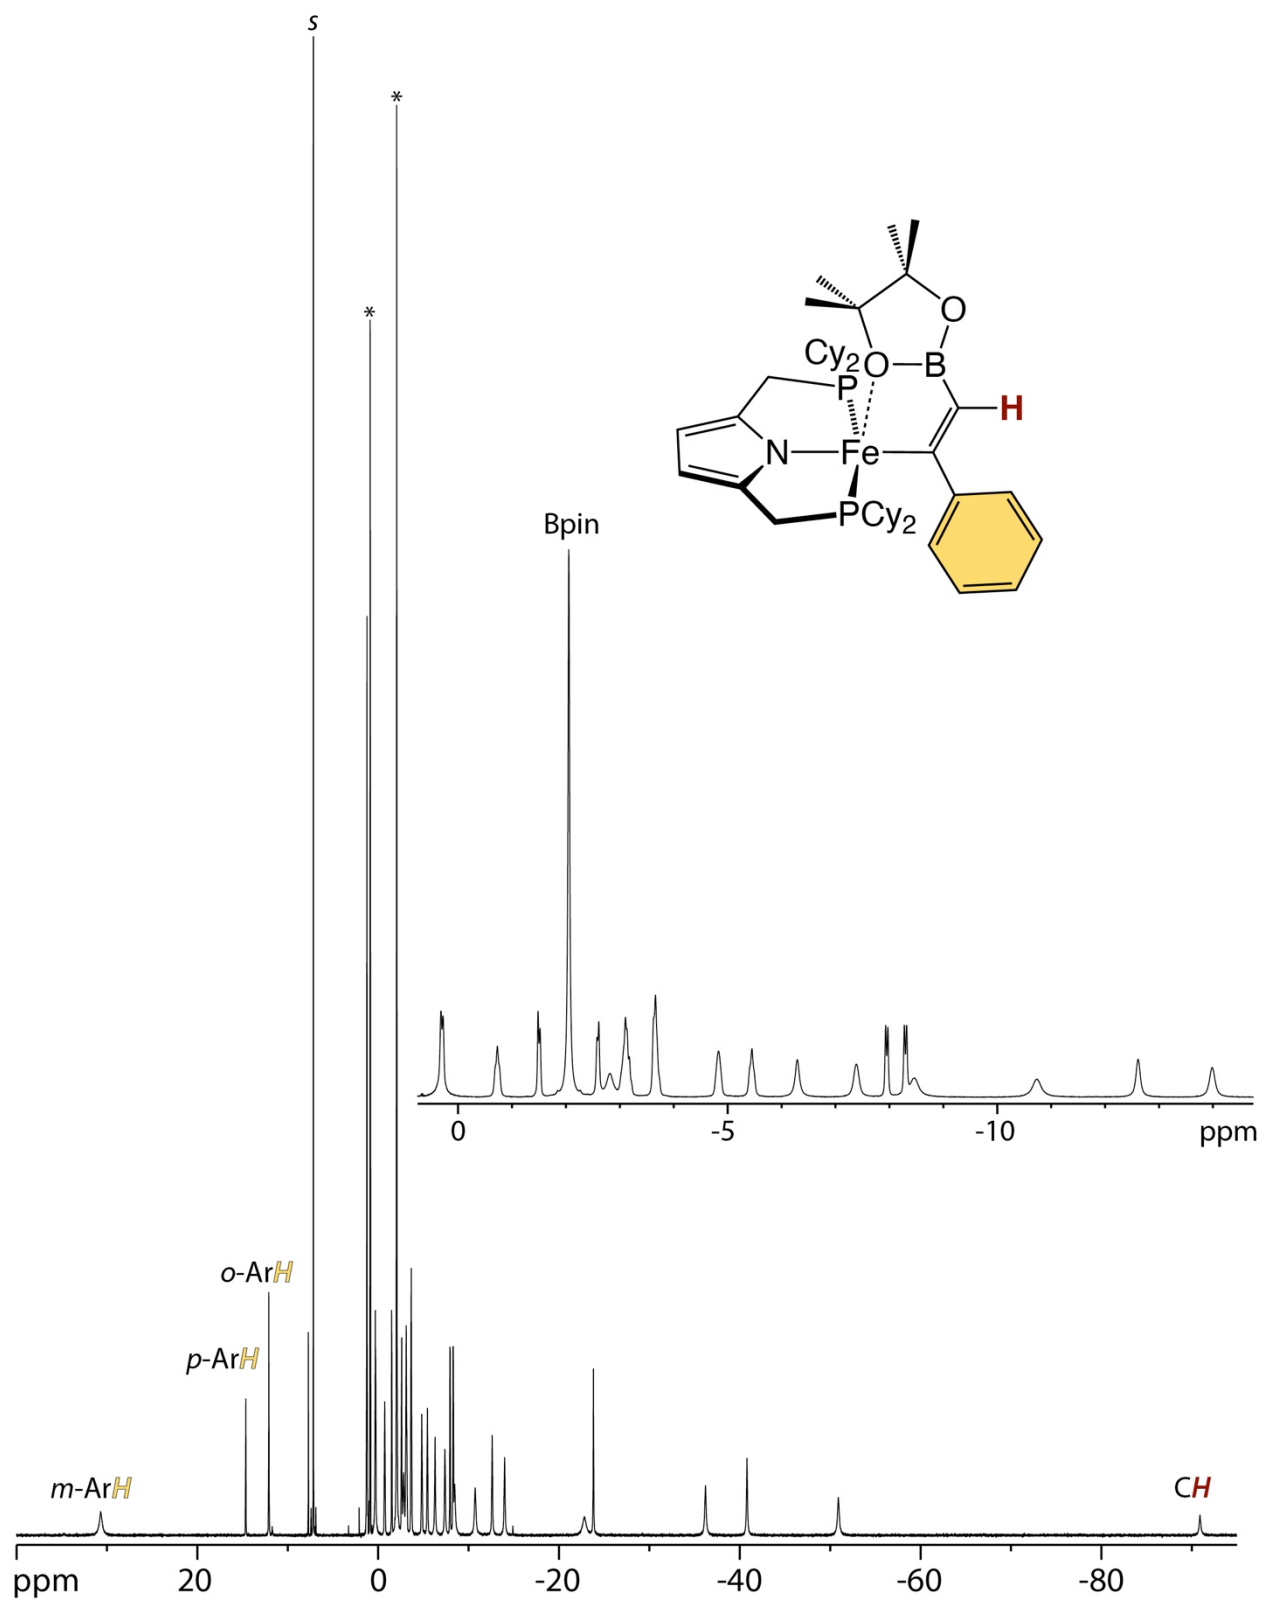

**Figure S10.** 300 MHz  $^1\text{H}$  NMR spectrum of  $[\text{Fe}(\text{C}(\text{Ph})\text{C}(\text{H})\text{Bpin})(\text{CyPNP})]$  (**5a**) in  $\text{benzene-}d_6(s)$ . Inset displays an expansion of the region from -15 to 1 ppm. Asterisks denote resonances for diethyl ether from purification.

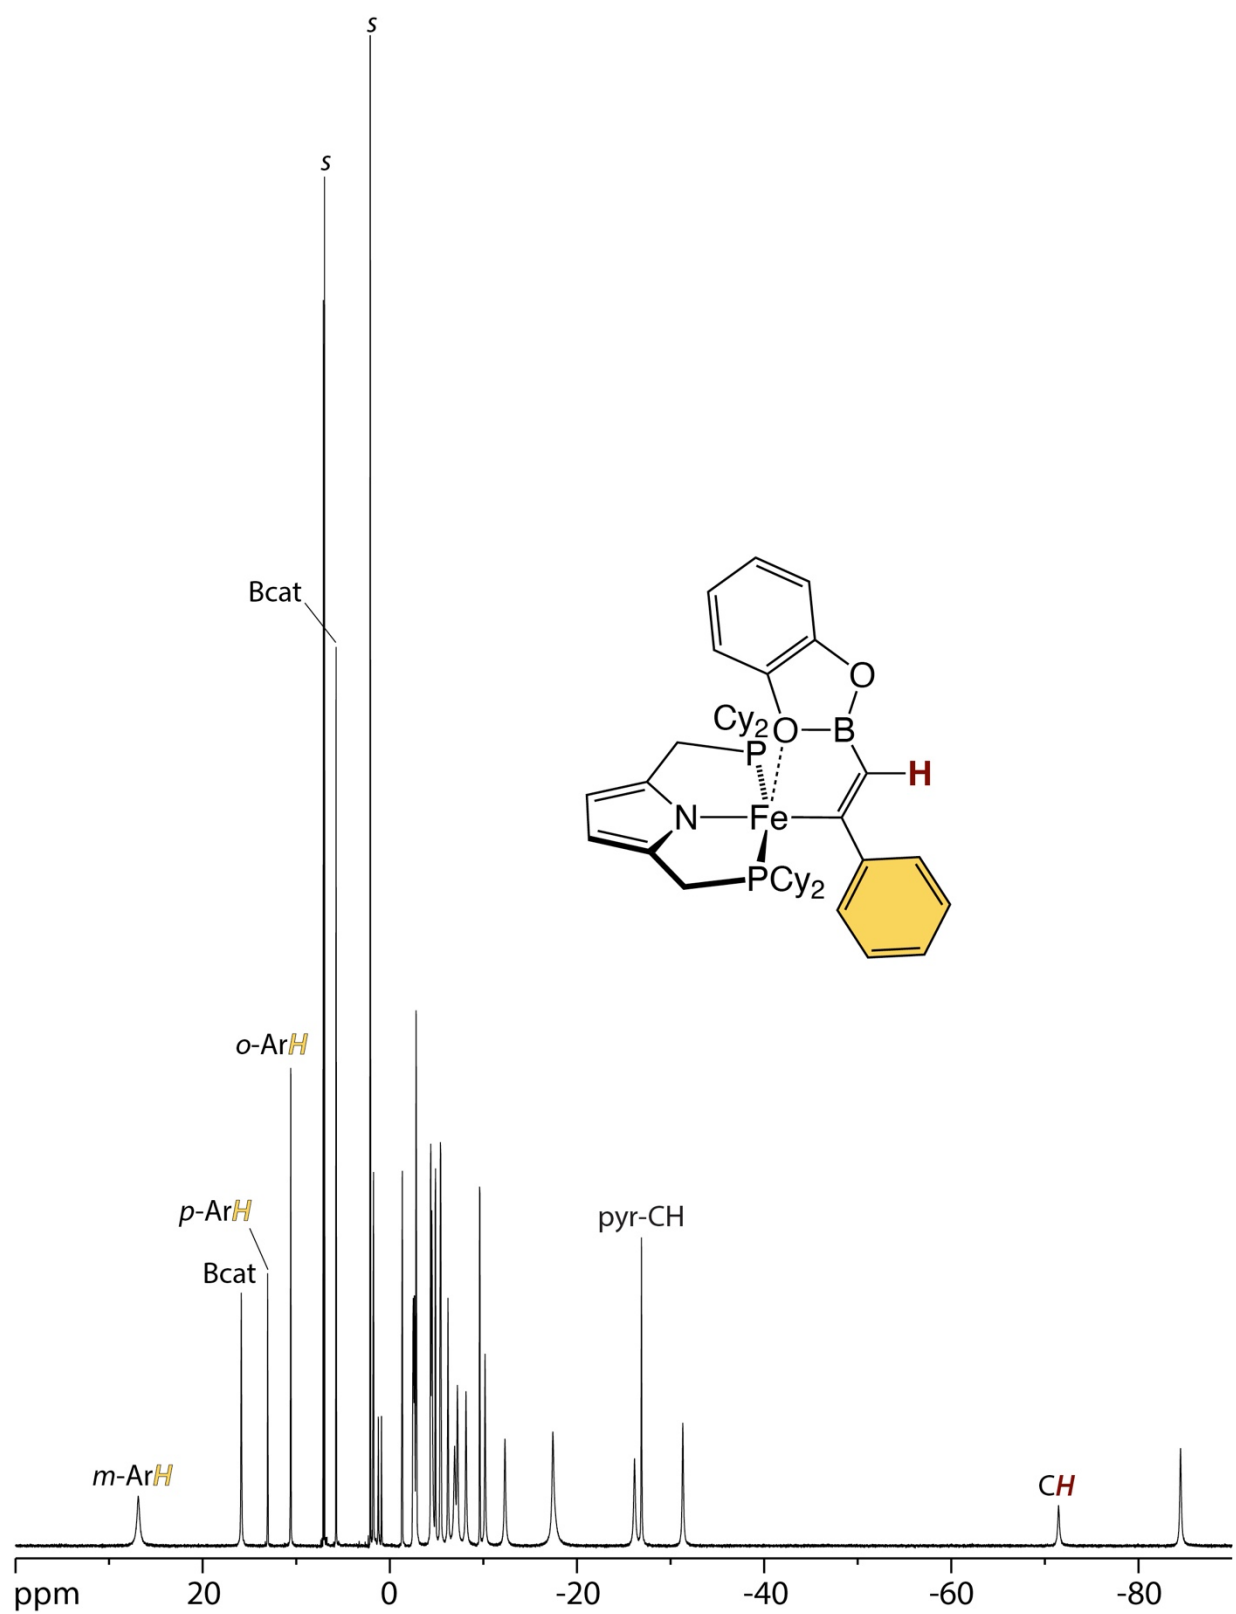

**Figure S11.** 300 MHz <sup>1</sup>H NMR spectrum of [Fe(C{Ph}C{H}Bcat)(<sup>Cy</sup>PNP)] (**5b**) in toluene-*d*<sub>8</sub>(*s*).

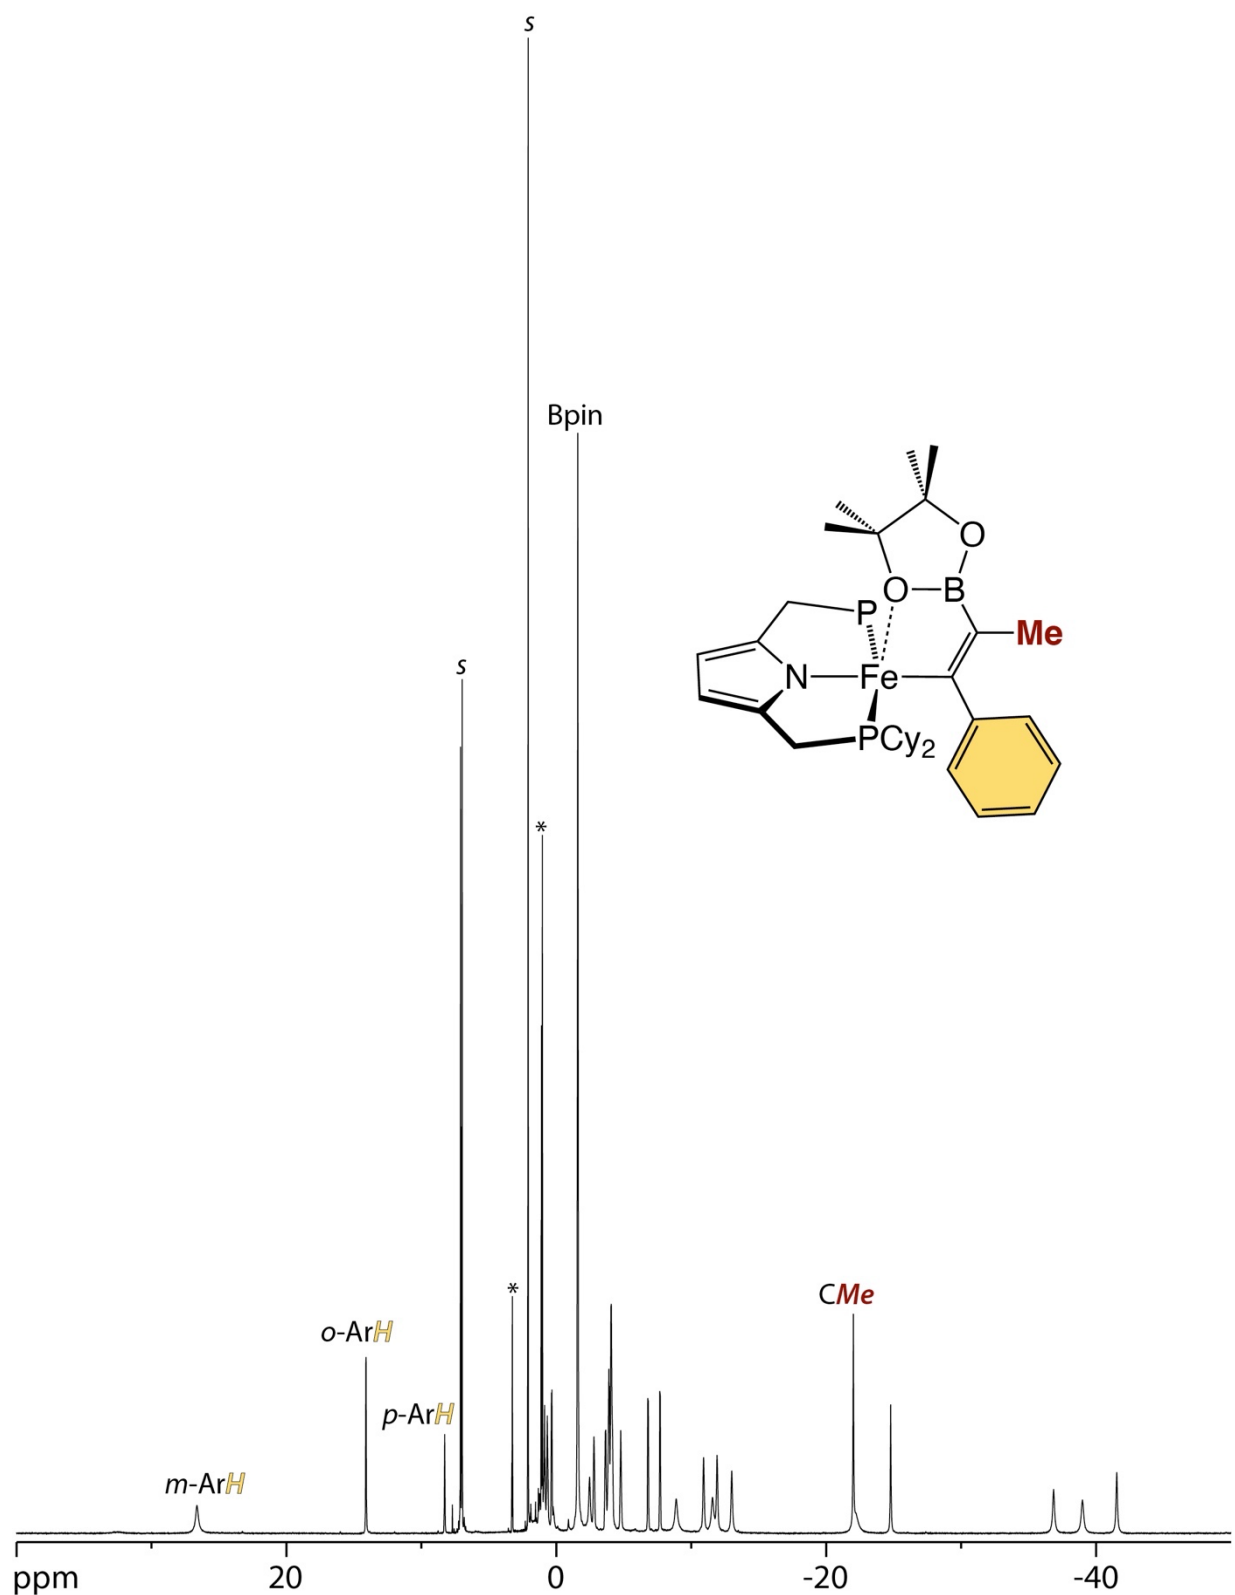

**Figure S12.** 300 MHz <sup>1</sup>H NMR spectrum of [Fe(C{Ph}C{Me}Bpin)(<sup>Cy</sup>PNP)] (**6a**) in toluene-*d*<sub>8</sub>(*s*). Asterisks denote resonances for diethyl ether from purification.

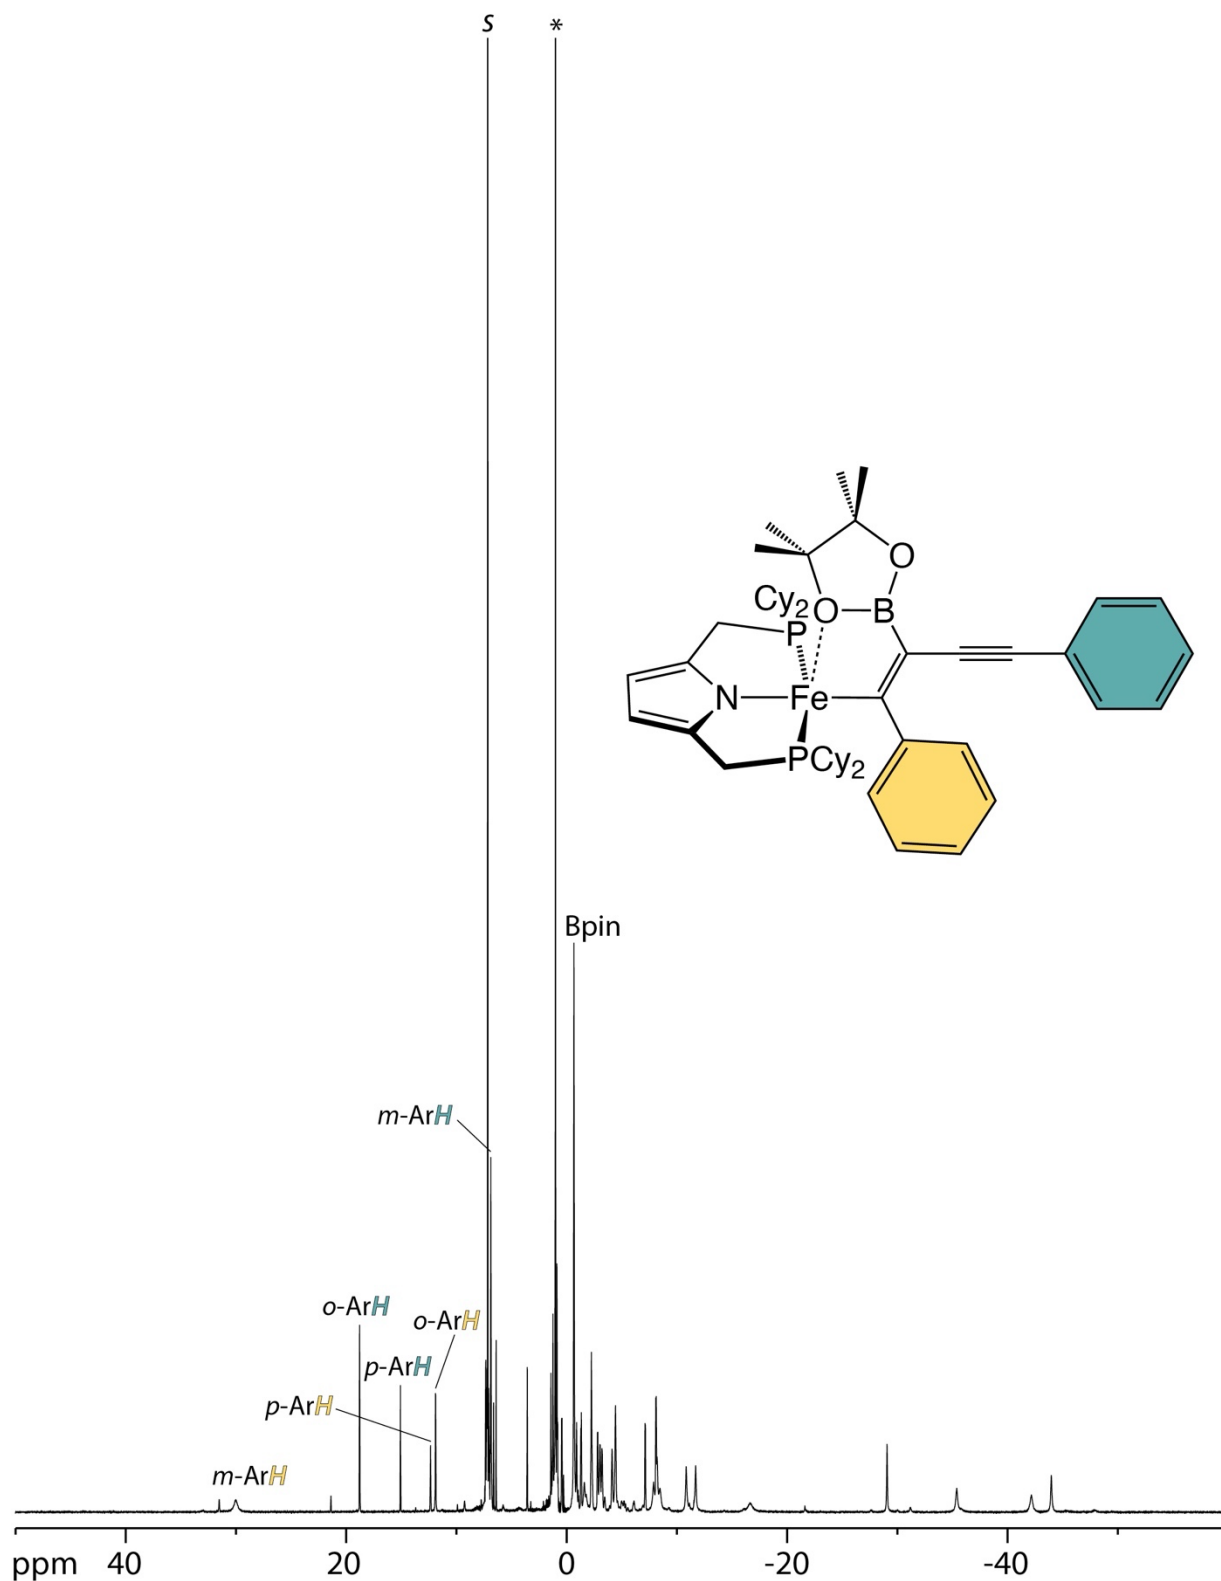

**Figure S13.** 300 MHz  $^1\text{H}$  NMR spectrum of  $[\text{Fe}(\text{C}(\text{Ph})\text{C}(\text{CPh})\text{Bpin})(\text{CyPNP})]$  (**7a**) in benzene- $d_6$ (s). Asterisk denotes resonances for residual  $\text{B}_2\text{pin}_2$  used in preparation of **3a**.

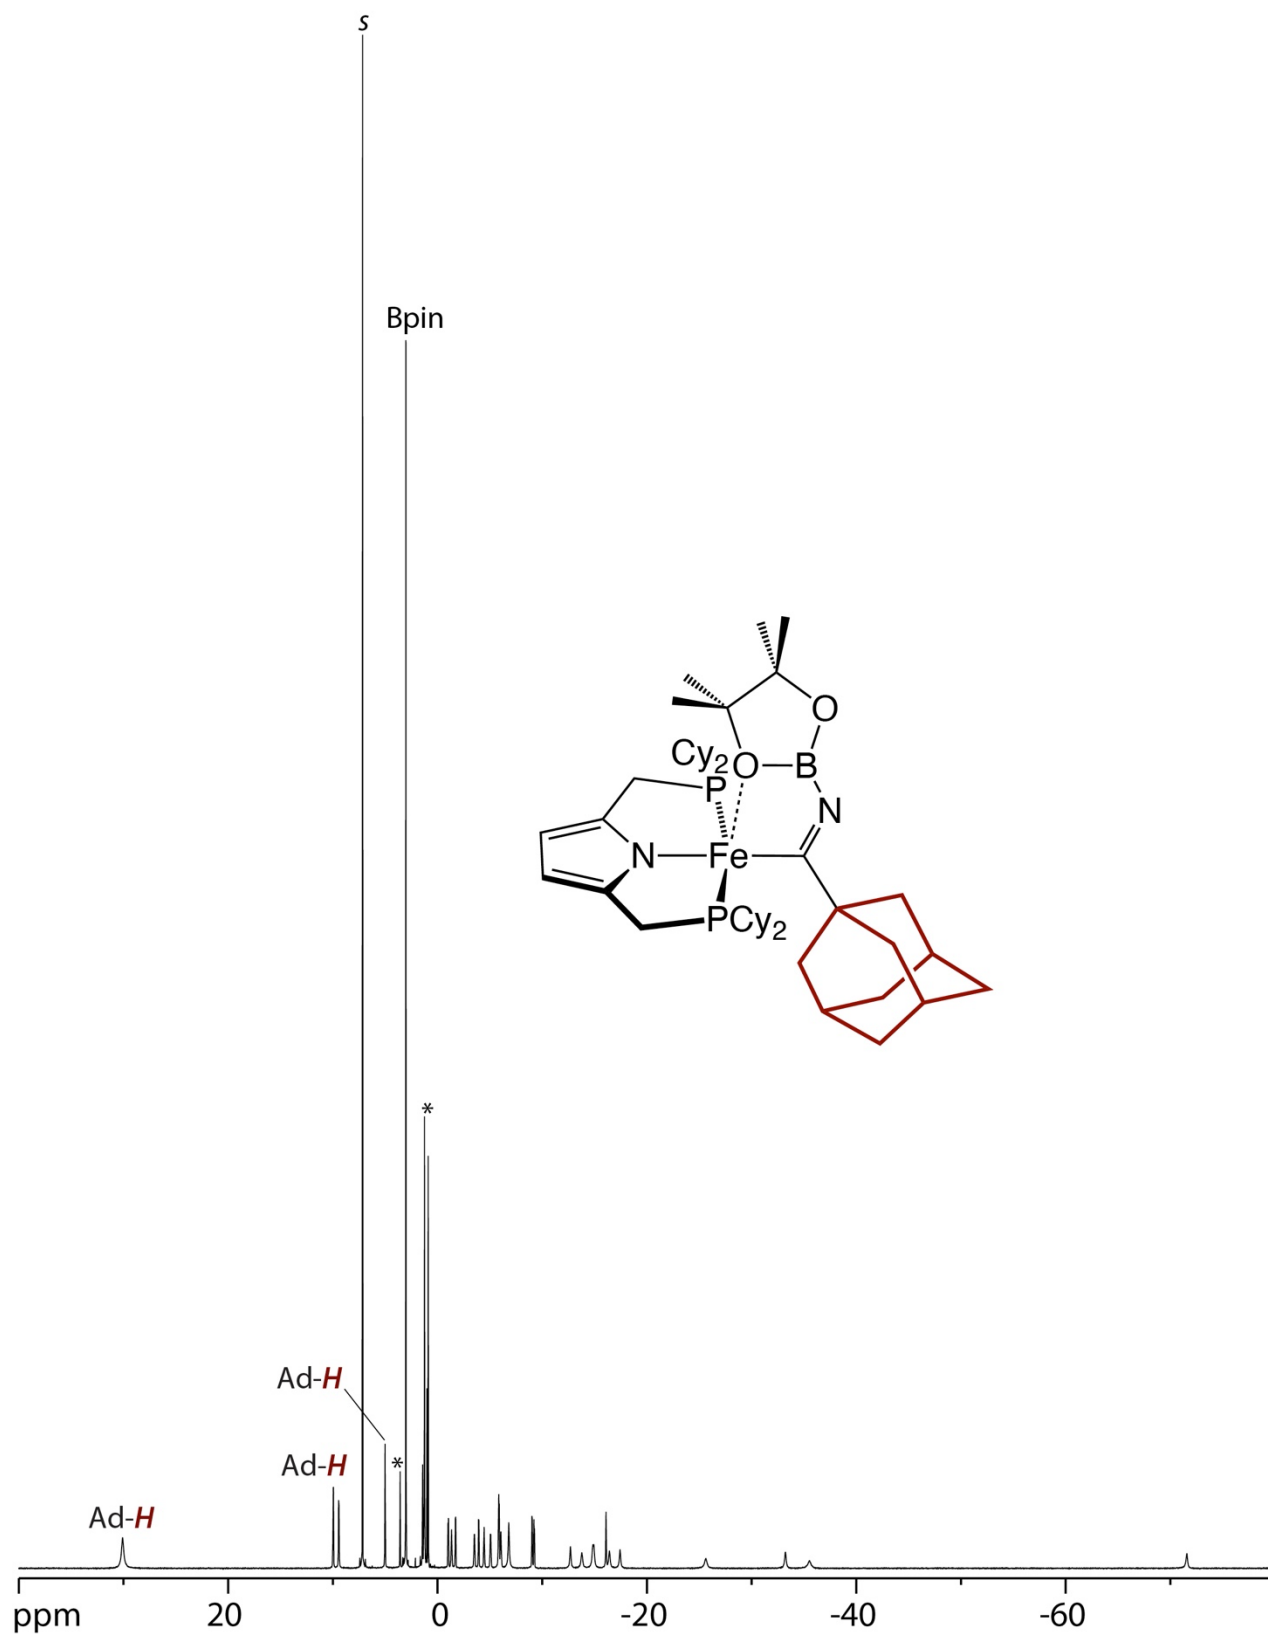

**Figure S14.** 300 MHz  $^1\text{H}$  NMR spectrum of  $[\text{Fe}(\text{C}\{\text{Ad}\}\text{NBpin})(\text{Cy}_2\text{PNP})]$  (**8**) in benzene- $d_6$ (s).

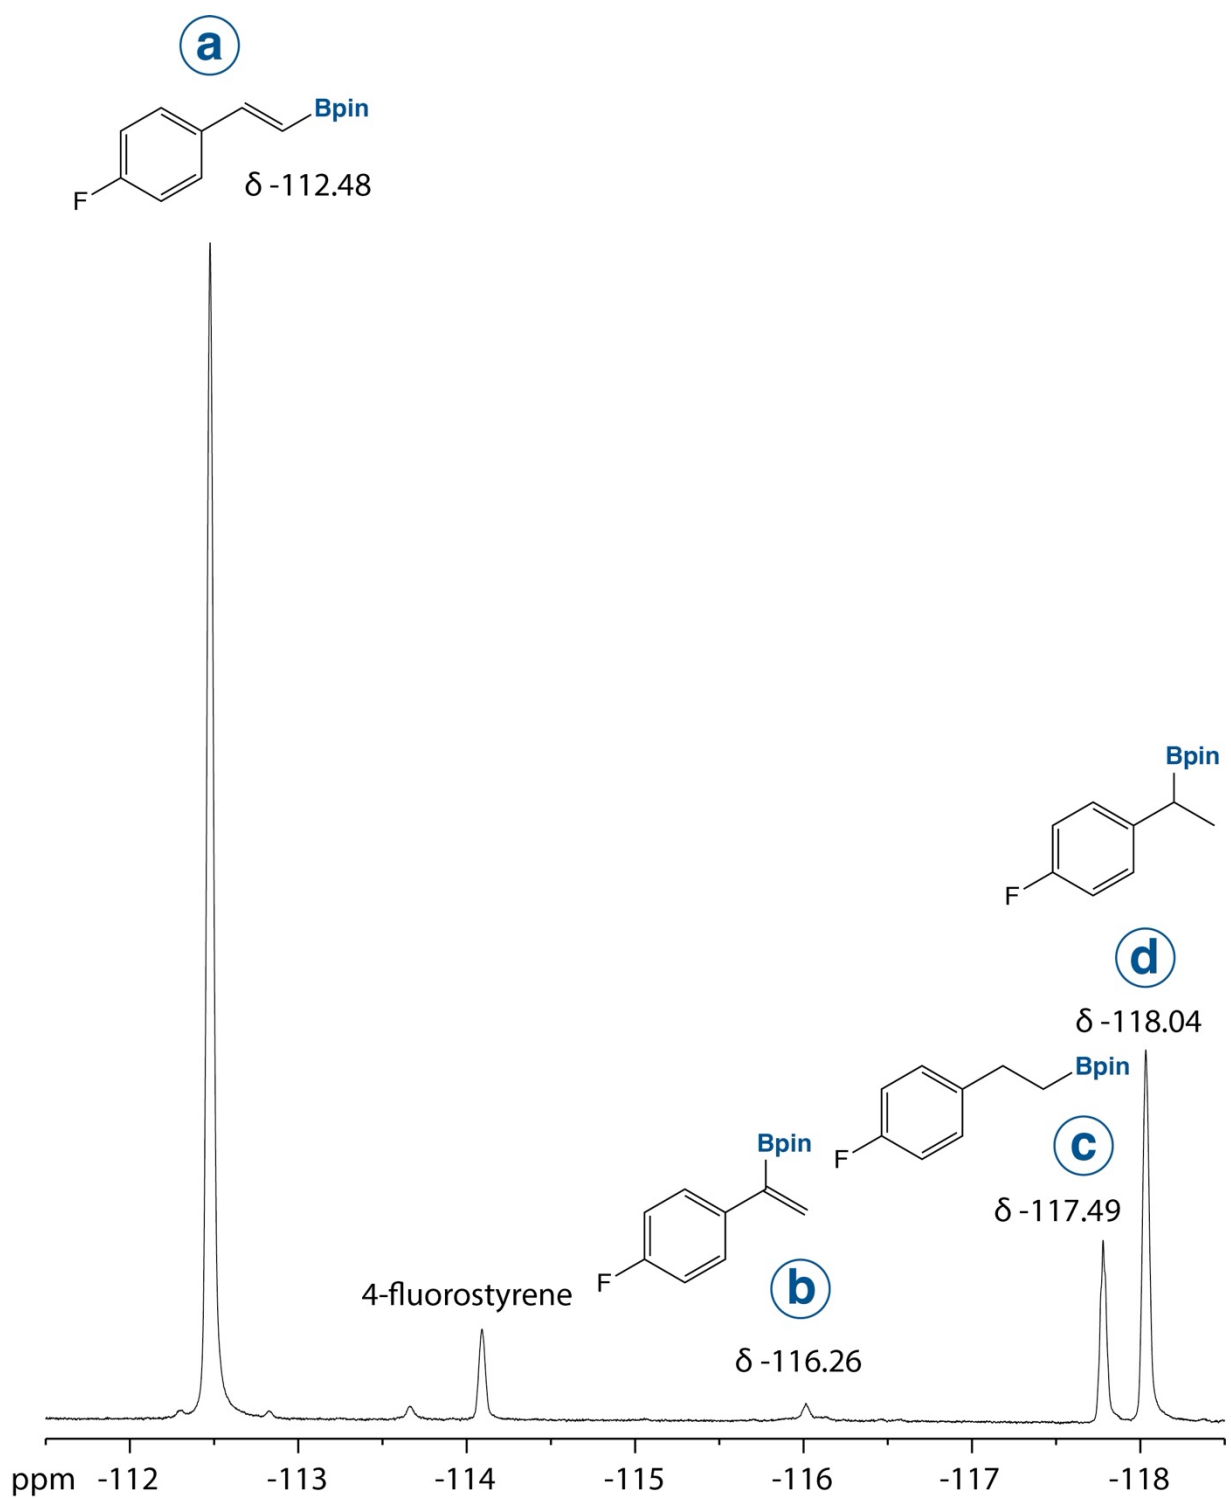

**Figure S15.** Selected region of the  $^{19}\text{F}$  NMR spectrum of the reaction of **3a** and 4-fluorostyrene in benzene- $d_6$ (s) showing formation of borylated products. Product assignments (a – d) correspond to those in Scheme 4 of the main text.



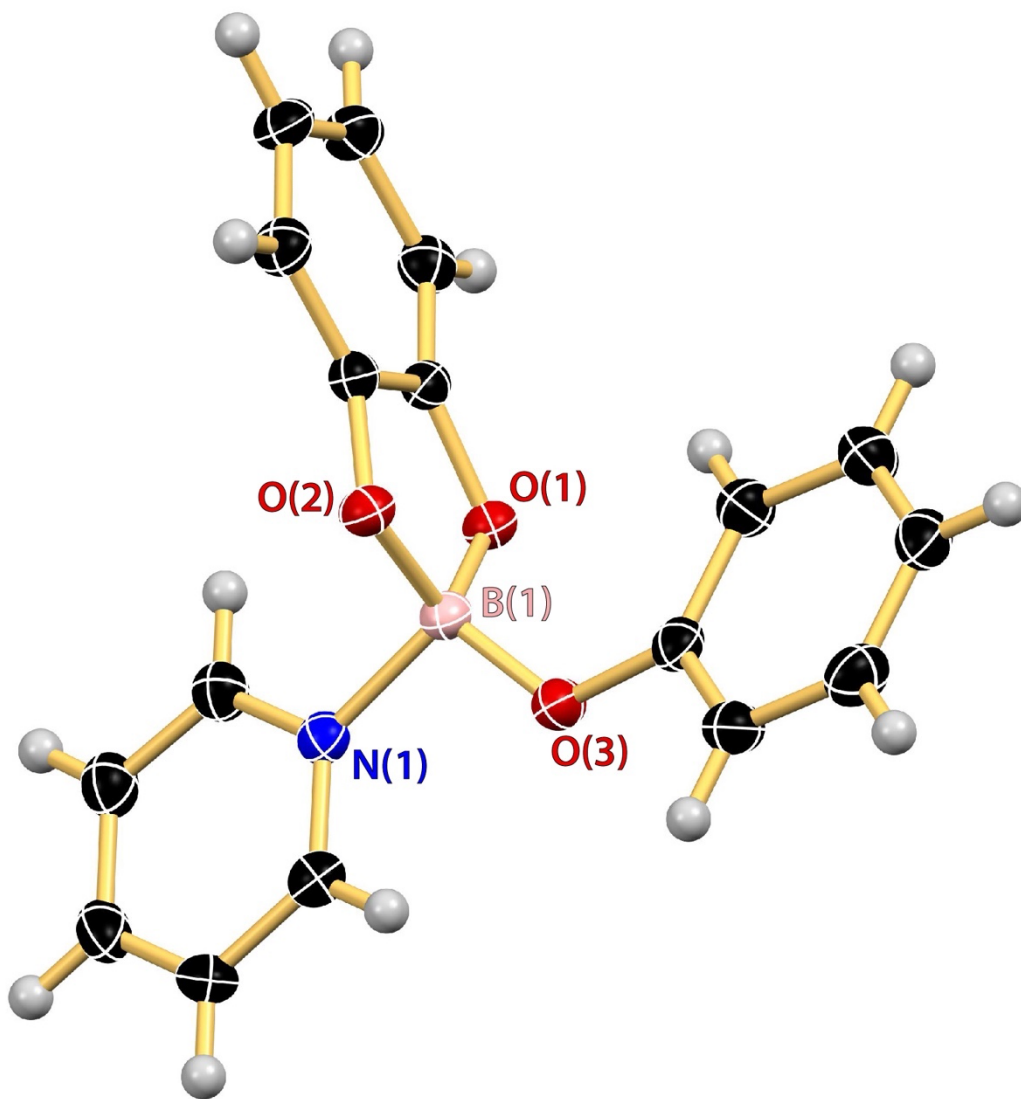

**Figure S16.** Thermal ellipsoid drawing (50%) of the solid-state structure of PhO(py)Bcat isolated from the synthesis of **3b**.

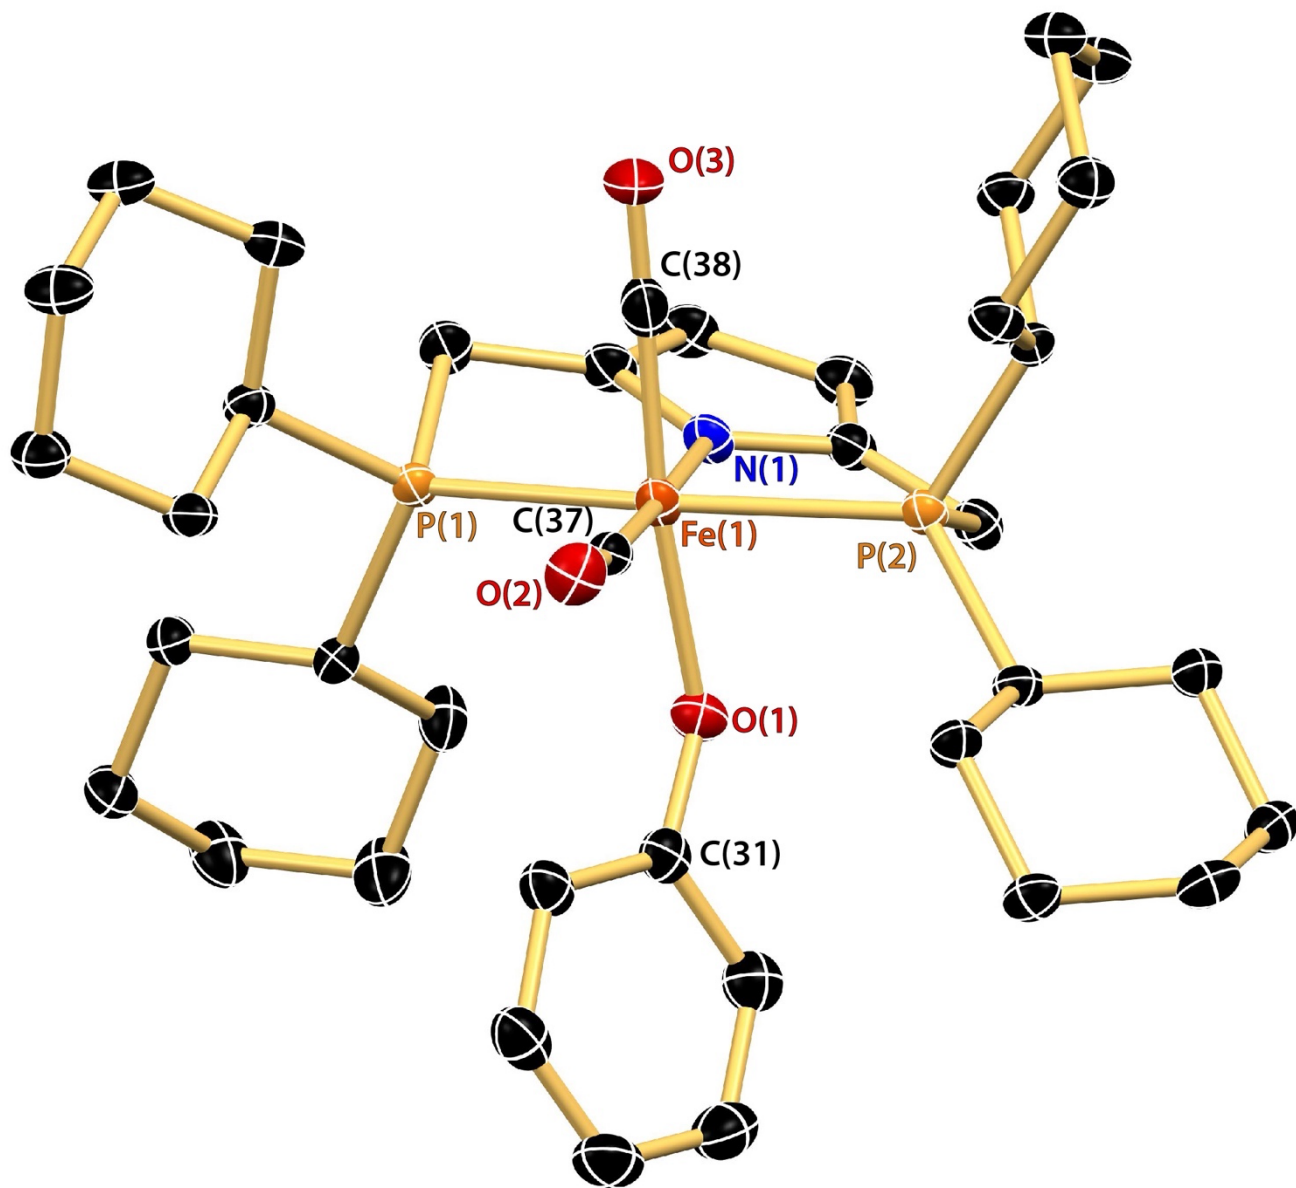

**Figure S17.** Thermal ellipsoid drawing (50%) of the solid-state structures of **1·CO**. Hydrogen atoms are omitted for clarity.

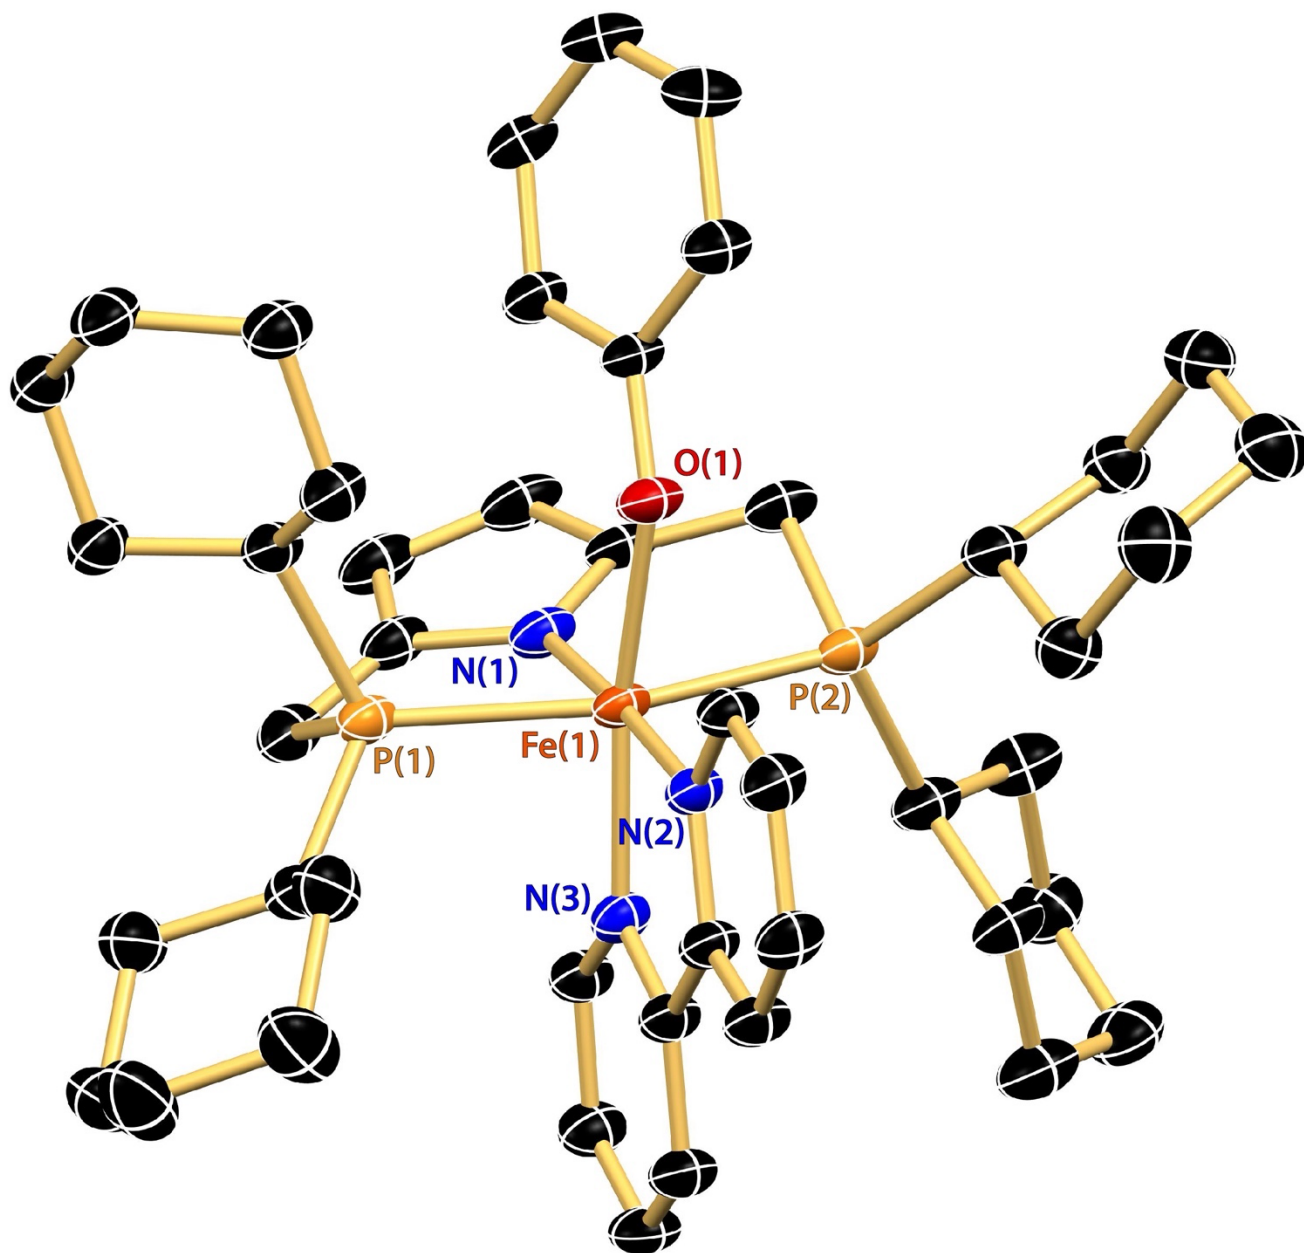

**Figure S18.** Thermal ellipsoid drawing (50%) of the solid-state structures of **1·bipy**. Hydrogen atoms are omitted for clarity.

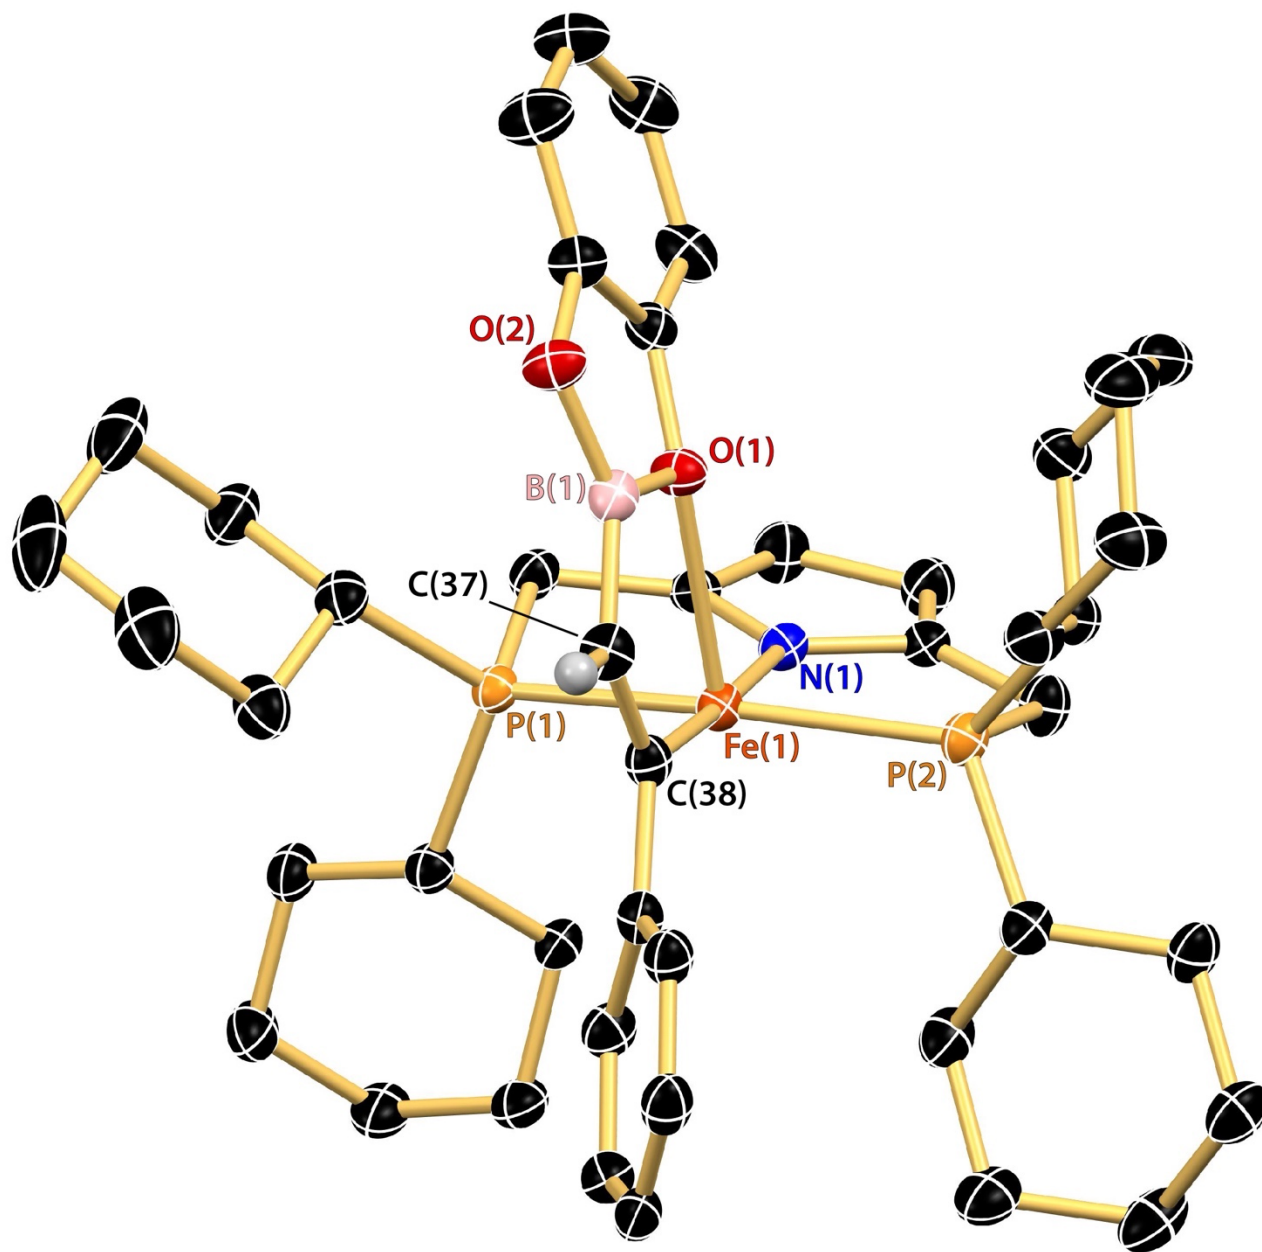

**Figure S19.** Thermal ellipsoid drawing (50%) of the solid-state structures of **5b**. Hydrogen atoms with the exception of that bound to C(37) are omitted for clarity.

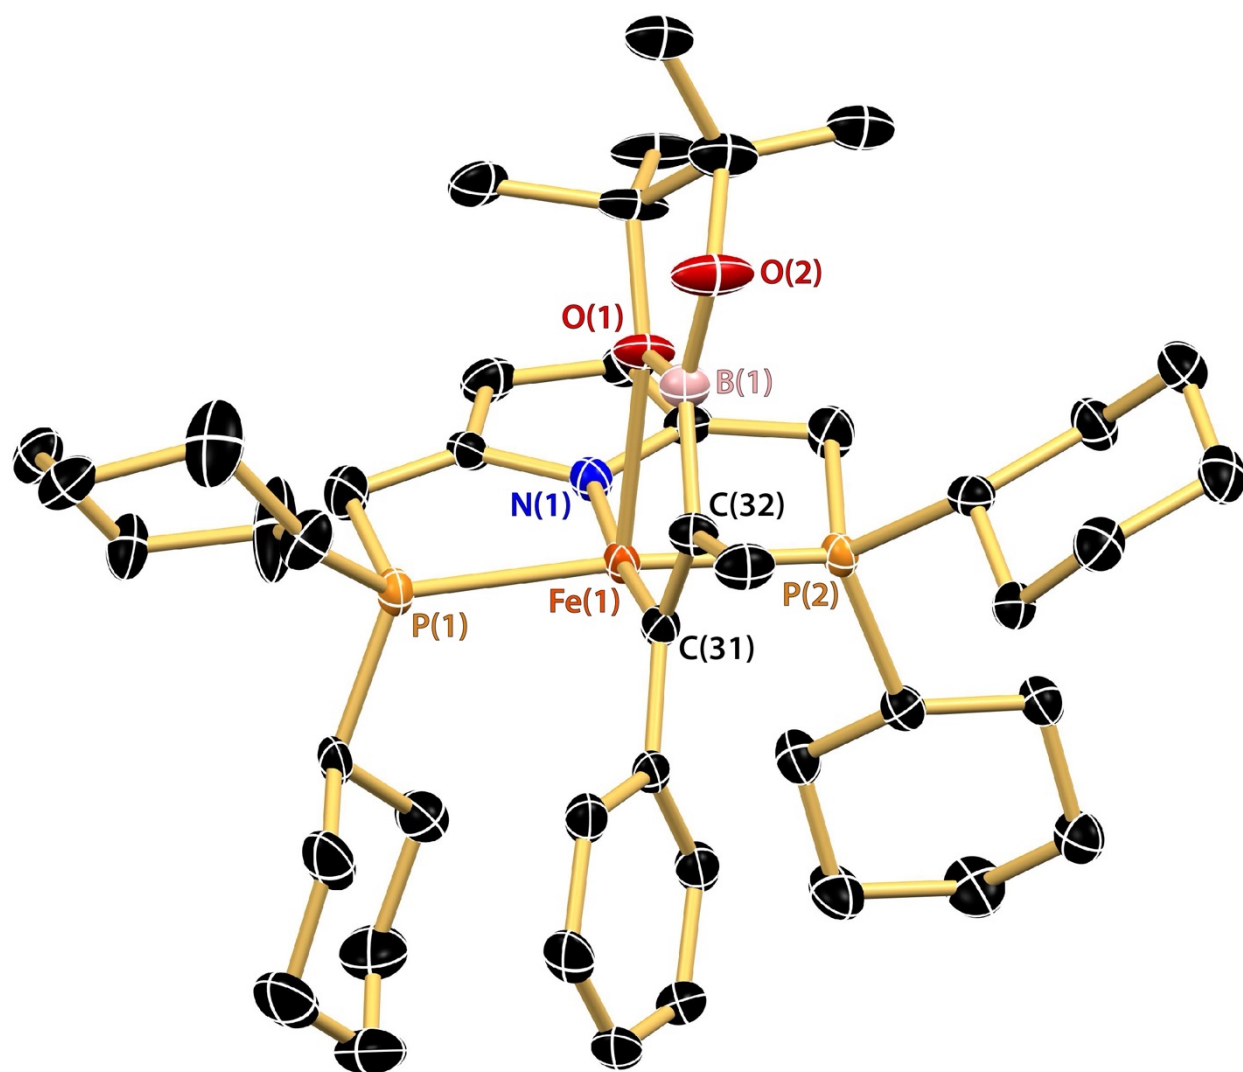

**Figure S20.** Thermal ellipsoid drawing (50%) of the solid-state structures of **6a**. Hydrogen atoms and minor components of the disorder are omitted for clarity.

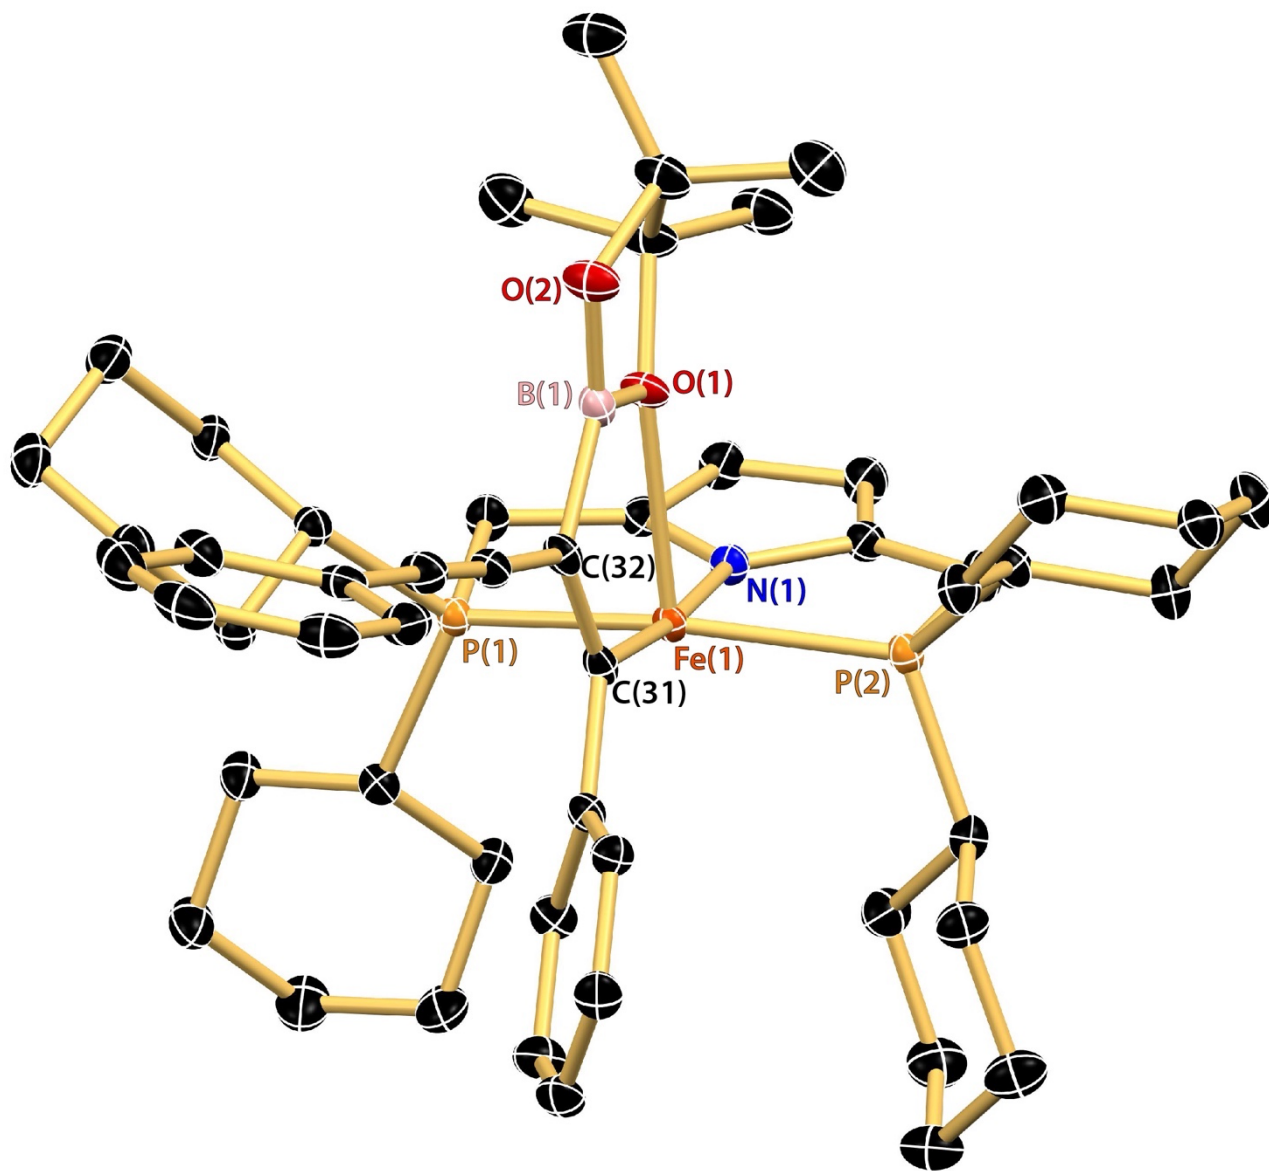

**Figure S21.** Thermal ellipsoid drawing (50%) of the solid-state structures of **7a**. Hydrogen atoms are omitted for clarity.
